# 1 GUT MICROBIOME ANALYSIS IN ADULT 2 TROPICAL GARS (*Atractosteus tropicus*)

3 Roberto Méndez-Pérez<sup>1†</sup>, Rodrigo García-López<sup>3,4†</sup>, J. Santiago Bautista-López<sup>1</sup>, Jorge F. Vázquez-  
4 Castellanos<sup>3,4</sup>, Emyr S. Peña-Marín<sup>5</sup>, Rafael Martínez-García<sup>5</sup>, Verónica I. Domínguez-Rodríguez<sup>2</sup>,  
5 Randy H. Adams-Schroeder<sup>2</sup>, Eduardo Baltierra-Trejo<sup>2,6</sup>, Carolina Melgar Valdés<sup>7</sup>, Andrés Moya<sup>3,4,✉</sup>,  
6 Carlos A. Alvarez-González<sup>5</sup>, [Rodolfo Gómez-Cruz](#)<sup>1,✉</sup>

7 † Equal contribution

8 <sup>1</sup>Biotech & Environmental Genomics and <sup>2</sup>Biorremediation Laboratories. Academic Body Environmental  
9 Sciences (CACIAM). Research Center for Conservation and Sustainable Use of Tropical Resources ([CICART](#)).  
10 Biological Sciences Academic Division ([DACBioI](#)). Juárez Autonomous University of Tabasco State ([UJAT](#)),  
11 Villahermosa, Tabasco, Mexico. <sup>3</sup>[Department of Genomics and Health](#). Valencian Region Foundation for the  
12 Promotion of Health and Biomedical Research ([FISABIO](#)), Valencia, Spain. <sup>4</sup>Integrative Systems Biology  
13 Institute (I2Sysbio), University of Valencia, Valencia, Spain. <sup>5</sup>Tropical Aquaculture Laboratory. [CICART-](#)  
14 [DACBioI-UJAT](#), Villahermosa, Tabasco, Mexico. <sup>6</sup>[CONACyT-UJAT](#). <sup>7</sup>General Aquaculture Laboratory.  
15 Multidisciplinary Academic Division of the Rivers ([DAMRios](#))-[UJAT](#). Tenosique, Tabasco, Mexico.

16 ✉ Corresponding authors: [Rodolfo Gómez – rodolfo.gomez@ujat.mx](#), Andrés Moya – [moya\\_and@gva.es](#)

17 **Abstract.** Tropical gar (*Atractosteus tropicus*), is freshwater and estuarine fish that has inhabited  
18 the Earth since the Mesozoic era, undergoing limited physiological variation ever since. This  
19 omnivorous fish is endemic to southern Mexico and part of Central America. Besides its  
20 recognized cultural and scientific relevance, the species has seen remarkable growth in its  
21 economic impact due to pisciculture. Previous studies have highlighted the role of microbial  
22 communities in fish, particularly those in the gut microbiome, in maintaining their host  
23 homeostasis or disease. In this study, we present the first report of the whole taxonomic  
24 composition of microbial communities in gut contents of adults' *A. tropicus*, by sex (female/male)  
25 and origin (wild/cultivated). Using culture-independent techniques, we extracted metagenomic  
26 DNA that was used for high throughput 16S rDNA profiling by amplifying the V4 – V5  
27 hypervariable regions of the bacterial gene. A total of 364,735 total paired-end reads were  
28 obtained on an Illumina MiSeq sequencing platform, belonging to 508 identified genera, with the  
29 most and least abundant are *Cetobacterium*, *Edwardsiella*, *Serratia*, *Clostridium sensu stricto*,  
30 *Paludibacter* and *Campylobacter*, *Snodgrassella*, *Albirhodobacter*, *Lentilitoribacter*, respectively. We  
31 detected that, by sex and origin, Proteobacteria, Fusobacteria, Firmicutes and Bacteroidetes phyla  
32 are the core gut microbiome of the adults' *A. tropicus*. We discover the Deinococcus-Thermus  
33 phylum sequence, wildtype males only, with extremophile capacity in another freshwater fish.  
34 We also identified the species *Lactococcus lactis* strains CAU929 and CAU6600, Cp6 and CAU9951,  
35 *Cetobacterium* strain H69, *Aeromonas hydrophila* strains P5 and WR-5-3- 2, *Aeromonas sobria* strain  
36 CP DC28 and *Aeromonas hydrophila* with probiotic potential in aquaculture within the three  
37 dominant phyla, especially in wild-type organisms.

38 **Keywords:** *Atractosteus tropicus*, gut microbiome, metagenomics, 16S rRNA profiling

39 **1. Introduction.** Aquaculture produces 76.6 million tons of fish for human consumption and  
40 economically ensures the livelihood of 10 to 12 % of the world population (FAO 2014, 2017). It has  
41 become the fastest growing food sector in the world, with an average annual growth rate of 8.9 %  
42 since 1970 (Subasinghe 2005) and there is a growing global trend towards diversifying the  
43 spectrum of cultured aquatic species. Biological diversity in Latin America is one of the richest on

44 the planet, including an important variety of its freshwater ichthyofauna (Flores-Nava y Brown  
45 2010). Some of the greatest challenges for aquaculture during this millennium have been the  
46 creation of integral studies on pisciculture-relevant endemic species and the development of  
47 technologies that may allow for controlled production of these fish in a profitable, innocuous and  
48 environmentally-conscious approach (Márquez-Couturier y Vázquez-Navarrete 2015). Studies in  
49 other fish have explored the bacterial populations in varying habitats such as the skin, gills, eggs  
50 and gut emicrobiome (GMB) and the way they influence the host's general health and  
51 physiology (MacFarlane *et al.* 1986, Cahill 1990, Ringø & Tabachek 1995, Givens 2012, Austin &  
52 Austin 2016). They have reported a large variation of microbiota among the different niches and  
53 between species with the GMB as one of the most studied due to its high microorganism  
54 concentration. Of interest for aquaculture-relevant species are outbreaks of viral,  
55 bacterial and fungal infections as they may cause devastating economic losses worldwide due to  
56 poor environmental conditions in the farms, unbalanced feeding, generation of toxins and genetic  
57 factors (Martínez-Cruz *et al.* 2012).

58 Tropical gar (*Atractosteus tropicus*, also known as pejelagarto) is freshwater and brackish fish  
59 species of the Lepisosteidae family, which has an ample fossil record since the Cretaceous period  
60 of the Mesozoic Era (Wiley 1976, Reséndez-Medina & Salvadores-Baledón 1983). The morphology  
61 of these species has remained mostly unaltered, with current specimens having lengths between  
62 1.0 and 1.2 m and weighing between 1000 and 3000 g in the wild. In their natural habitat, this  
63 species exists in coastal wetlands of the tropical rainy areas of southeastern Mexico, Belize,  
64 Guatemala, El Salvador, Honduras, Nicaragua and Costa Rica (Wiley 1976, Bussing 1998, Miller  
65 *et al.* 2005, Nelson 2006). It is an omnivore, feeding on other fish, decomposing organic matter,  
66 crustaceans, plants, etc., depending on the availability, preferring carnivorous habits. This  
67 specially secluded species has seen a drastic decrease in wild populations, caused by  
68 anthropogenic activities that have led to the loss of habitats and severe ecological alterations  
69 (Méndez-Marín *et al.* 2012). Currently, *A. tropicus* is cultivated in fish farms for human  
70 consumption in Mexico (Márquez *et al.* 2015).

71 , The gastrointestinal tract of *A. tropicus*, is formed by the buccopharyngeal, esophagus, stomach,  
72 gut, pyloric blind, rectum and anus, which is rapidly developing during the larval period (Frías-  
73 Quintana *et al.* 2015). Having absorbed and secretory function, its intestine is a long tube, narrower  
74 than the stomach with an inner epithelial mucosa that forms long, and numerous folds comprised  
75 of high columnar cells with clearly defined brush border (Márquez-Couturier *et al.* 2006). Having  
76 absorbed and secretory function, its intestine is a long tube, narrower than the stomach with an  
77 inner epithelial mucosa that forms long, and numerous folds comprised of high columnar cells with  
78 clearly defined brush border (Márquez-Couturier *et al.* 2006). In the anterior and middle regions,  
79 long folds divide these regions into a series of compartments called a spiral valve. The shorter  
80 posterior region forms the rectum, which opens in the anus. The external muscle in the intestine is  
81 thinner than in the stomach. Early juveniles 20 days after hatching show a GMB like that of adults.  
82 Before colonization, microorganisms may access the GMB through food and water intake during  
83 the larval phase (Núñez de la Rosa 2011). The high abundance of certain groups of gastrointestinal  
84 bacteria in fish, when compared to the microbial composition of the surrounding water suggests  
85 that GMB poses as a unique niche for a specific, but diverse group of bacteria (Cahill 1990, Givens  
86 2012). It has been reported that GMB fish has between  $10^7$  and  $10^{11}$  bacteria per gram of feces (Nayak  
87 2010). GMB fish plays an important role and directly influences the host's nutrition and general  
88 homeostasis. Normal GMB fish may contain both beneficial and potentially pathogenic bacteria.  
89 The loss of the microbiota equilibrium (dysbiosis) has been reported to impact the host's  
90 physiological state, potentially compromising immunity, growth, general development as well as

91 the overall quality of the aquaculture production due to an increase in fish morbidity and mortality  
92 (Núñez de la Rosa 2011, Al-Harbi and Udding, 2005).

93 Prior to 2005, microbial studies on fish relied exclusively on culture techniques for enumerating  
94 and identifying bacteria (Newman *et al.* 1972, MacFarlane *et al.* 1986, Spanggaard *et al.* 2000,  
95 Aschfalk & Müller 2002, Verner-Jeffreys *et al.* 2003, Al-Harbi & Uddin 2004, Martin-Antonio *et al.*  
96 2007, Skrodenyté 2007), providing valuable information as isolates provide a suitable framework  
97 for studying individual culturable strains on a finer level but limited appreciation of the whole  
98 spectrum in microbial communities. In 2007, Izvekova and collaborators reviewed GMB fish  
99 studies published between 1929 and 2006 reporting 73 different bacteria. This is because culturable  
100 bacteria typically account for less than 1 % of the cells that are present by direct microscopic  
101 enumeration (Ferguson *et al.* 1984, Head *et al.* 1998).

102 The advent of culture-independent metagenomic studies during the mid-2000s enabled the  
103 simultaneous analysis of complex genomic information contained in a hundreds of microbial species  
104 in a single niche (Nielsen *et al.* 2014). These techniques circumvent most culturing requirements of  
105 microorganisms, avoiding collection and sampling biases, effectively representing the actual  
106 diversity of a microbial community. Under intensive production conditions for sustainable  
107 aquaculture, aquatic species are subjected to high-stress conditions, leading to an increased  
108 incidence of diseases that decrease productivity (Bondad *et al.* 2005). It has been proposed that  
109 microbiota dysbiosis may be avoided through the regulation of their microbiota (Verschuere *et al.*  
110 2000).

111 Microbial studies in aquaculture focus on the understanding of the symbiotic or antagonistic  
112 interactions between microbes and their eukaryotic hosts such as fish, crustaceans and molluscs. In  
113 this sense, metagenomics can provide a deeper understanding of these relationships through  
114 information revealed by sequencing microbial DNA extracted from specific niches within host  
115 organisms and, in the case of 16S profiling, taxa are representative of the medium (Suttle 2007,  
116 Gianoulis *et al.* 2009). This latter consists of surveying the 16S rRNA gene of all present  
117 microorganisms as this marker is found in all prokaryotes with enough mutations to discern each  
118 taxon. Formerly, some bacteria had been difficult to isolate because some of them are obligate  
119 intracellular microorganisms that could only be cultured in semi-aqueous and/or cellular culture  
120 media (Avila-Villa *et al.* 2011). Current sequencing platforms and bioinformatic tools enable the  
121 research on the diversity of intracellular bacteria, but also to ignore culture other culture  
122 requirements altogether as the DNA from the whole community are sequenced as is, with majority  
123 and accessory species, in order to elucidate the relevant community configurations for the  
124 improvement of aquaculture techniques. Consequently, the objective of this research was to explore  
125 the bacterial composition in the gut of adults' *A. tropicus*, by analyzing the 16S rRNA gene profiles  
126 from adult male and female organisms, cultivated and wild, for biotechnological-relevant  
127 applications future.

## 128 2. Materials and methods

129 *Specimen collection.* Fifteen totals live adults' *A. tropicus* were collected for the study, 7 of them were  
130 cultivated in the Tropical Aquaculture Laboratory, [Research Center for Conservation and](#)  
131 [Sustainable Use of Tropical Resources](#) (CICART) at [Biological Sciences Academic Division](#)  
132 (DACBiol), [Juárez Autonomous University of Tabasco State](#) (UJAT), Mexico, and 8 wildtype, with  
133 an average weight and length of 5 kg and 1 m, respectively. This specimens were provided by  
134 fishermen of the municipalities of Nacajuca ([18°14'50"N 92°49'58"O](#); n female, m male) and Centla  
135 ([18°20'00"N 92°30'00"O](#); n female, m male), Tabasco, Mexico (Figure 1). All specimens were cut

136 lengthwise under sterile conditions to remove the intestine for extracting its contents with scissors  
137 disinfected in absolute ethyl alcohol, for storage at -20 °C in a 2 mL Eppendorf tubes.

138 *Samples collection.* All organisms were sacrificed according to the protocol was approved by  
139 Secretaría de Agricultura, Ganadería, Desarrollo Rural, Pesca y Alimentación (NOM-062-ZOO-  
140 1999) on 18 June 2001 by percussion stunning method, consisting of striking a quick blow on the  
141 head of the fish manually with a bat, to obtain fresh samples, squeezing the GMB and obtaining the  
142 feces separately, considering the geographical origin and sex by sterile conditions.

143 *DNA extraction, pyrosequencing and sequence for metagenomic analysis.* 200 mg of fresh feces were used  
144 and 2 mL were enough to ensure the target DNA with a capacity of the Eppendorf tubes selected.  
145 A whole genomic DNA (gDNA) extraction was carried out for each sample with a QIAamp DNA  
146 Stool Mini Kit (Qiagen, Valencia, CA, USA), following the manufacturer's instructions. DNA  
147 integrity and concentration was evaluated by electrophoresis submerged with 1.2 % agarose gel  
148 and by spectrophotometry with a GenovaNano spectrophotometer (Jenway, Stone, Staffs, UK),  
149 respectively. Universal primers 533F (5'-GTGCCAGCAGCCGCGTAA-3') (Weisburg 1991) and  
150 909R (5'-CCCCGYCAATTCMTTTRAGT-3') (Tamaki *et al.* 2011) were selected for the amplification  
151 a region including the V4 and V5 hypervariable region in the 16S rRNA gene. PCR amplifications  
152 were carried out using Phusion High-Fidelity DNA Polymerase (Finnzymes OY, Espoo, Finland;  
153 Klindworth *et al.* 2013) and conditions were as follows: Library preparation and high throughput  
154 sequencing was performed through Research & Testing Labs (Lubbock, Texas, USA) services, with  
155 an Illumina MiSeq platform, using 16S rDNA profiling by amplifying the V4 – V5 hypervariable  
156 regions of the bacterial gene, reagents sequencing for 2x 300 bp paired-end reads.

157 *Bioinformatic analysis.* The sequences were subjected to the standard quality protocols, which  
158 included the sequencing adapters removal with the Cutadapt tool (1.18), the too short and low-  
159 quality sequences filtering based on the Phred quality score implemented in the PRINSEQ tool.lite  
160 (0.20.4). The paired-end were concatenated with -fastq\_join command of the USEARCH program  
161 (V.11) and the chimeras were removed with -uchime2\_ref command of the same program, using  
162 as reference the Gold database (microbiomeutil-r20110519). The sequences were clustered in OTUs  
163 with 97 % identity by usearch61\_ref algorithm, using the SILVA132 database as a reference through  
164 the pick\_otus.py command in QIIME (1.9) and OTUs were filtered with 3 or fewer sequences.

165 Alpha diversity was measured through the Chao1, Shannon and P. D. (Phylogenetic Diversity)  
166 diversity indexes, which were calculated by alpha\_rarefaction.py command in QIIME (1.9). The  
167 Alpha diversity among samples and origin of the samples (wild and farmed) were compared using  
168 Kruskal-Wallis statistic (Multiple range test, Bonferroni post-hoc) and Mann-Whitney W statistic  
169 (Wilcoxon), respectively, both implemented in the ggpubr library of R software (V.3.4.4).

170 Beta Diversity was analyzed using a PCoA constructed from the Unweighted UniFrac distance,  
171 calculated with the beta\_diversity\_through\_plots.py command from QIIME (1.9), the difference  
172 among groups was evaluated by ANOSIM statistical test, and the main coordinates of the PCoA  
173 were graphed in the factoextra library in R (V.3.4.4) and Differential Analysis of Abundance  
174 was compared the abundance patterns of the taxa between the groups of samples through LEfSe (Linear  
175 discriminant analysis effect size).

176 *Phylogenetic analysis.* A sequences base was constructed according to certain genera with probiotic  
177 potential in fish that we find in the literature sought (Table 1), 16S rRNA gene sequences were  
178 obtained from the NCBI GenBank database. The 6,266 sequences obtained were clustered to  
179 eliminate identical sequences and generate a table of OTUs with 97 % similarity, using the

180 usearch61 algorithm of QIIME (1.9). The database was indexed (Query Sequence) to be used in a  
181 local blast with the BLAST + tool (NCBI). The local blast was performed using the sequences of the  
182 samples (Subject sequences) clustered at 97 % as mentioned in the section on the processing of the  
183 sequences. The identity percentage was adjusted to 99 % (-perc\_identity) and a coverage of 70 %  
184 (-qcov\_hsp\_perc 70). For phylogenetic analysis, the blast resulting Query and Subject sequences  
185 were subjected to a multiple alignment with the ClustalW algorithm, in MEGAX (Molecular  
186 Evolutionary Genetics Analysis), and the phylogenetic relationships were inferred by the  
187 Neighbor-joining method in MEGAX, with the predefined settings.

188 **3. Results.** The pyrosequencing method of the Illumina MiSeq platform was evaluated that uses  
189 the Research & Testing Labs (Lubbock, Texas, USA) services, applying 16S rRNA in V4 – V5  
190 hypervariable regions. A total of 364,735 sequencing reads were generated, organized by sex and  
191 origin, according to Table 2. We can visualize in Table 2 that readings obtained of wildtype male  
192 organisms are far greater than of wildtype and cultivated females, and cultivated males. Sequences  
193 were clustered into 16,503 different OTUs (97 % identity), which were classified into 11 phyla, 22  
194 class, 37 order, 86 families and 179 genera. Table 2 shows that about twice as many reads  
195 correspond to wild male.

196 *Microbiota composition.* The cultivated organisms, wildtype females and males' samples are  
197 dominated by the *Fusobacteria* (37.32 %), *Proteobacteria* (30.49 %) and *Firmicutes* (18.55 %) phyla,  
198 respectively (Figure 2a). In wildtype females the most abundant phyla were *Proteobacteria* ( $0.70 \pm 0.28$  SD),  
199 *Firmicutes* ( $0.38 \pm 0.32$  SD) and *Fusobacteria* ( $0.24 \pm 0.29$  SD) and in cultivated females  
200 are *Proteobacteria* ( $0.64 \pm 0.20$  SD), *Fusobacteria* ( $0.54 \pm 0.25$  SD) and *Bacteroidetes* ( $0.45 \pm 0.006$   
201 SD). In wildtype and cultivated males, the most abundant phyla are *Fusobacteria* ( $0.63 \pm 0.39$  SD),  
202 *Proteobacteria* ( $0.40 \pm 0.26$  SD) and *Fusobacteria* ( $0.76 \pm 0.36$  SD), *Proteobacteria* ( $0.19 \pm 0.21$  SD),  
203 respectively. *Actinobacteria* ( $0.16 \pm 0.17$  SD) and *Deinococcus-thermus* ( $0.003 \pm 0.006$  SD) were  
204 identified only in wildtype females and wildtype males, respectively. The same tendency is  
205 observed in male and female specimens, since the dominant phyla in both wild type and  
206 cultivated ones are *Fusobacteria* ( $0.63 \pm 0.39$  SD), *Proteobacteria* ( $0.70 \pm 0.28$  SD) and *Fusobacteria*  
207 ( $0.76 \pm 0.36$  SD) and *Proteobacteria* ( $0.64 \pm 0.20$  SD), respectively (Figure 2a). At the genus level,  
208 the most abundant in wildtype females are *Edwardsiella* ( $0.32 \pm 0.53$  SD) and *Cetobacterium* ( $0.24 \pm$   
209  $0.29$  SD), and in cultivated females are *Serratia* ( $0.57 \pm 0.17$  SD) and *Cetobacterium* ( $0.54 \pm 0.25$  SD).  
210 In wildtype males, the most abundant genera are *Cetobacterium* ( $0.63 \pm 0.39$  SD) and *Clostridium*  
211 *sensu stricto* ( $0.32 \pm 0.49$  SD) in cultivated males *Cetobacterium* ( $0.75 \pm 0.29$  SD) and *Edwardsiella*  
212 ( $0.22 \pm 0.30$  SD) (Figure 2b). In the case *Cetobacterium* (37.34 %) and *Edwardsiella* (10.55 %) genera  
213 are the most abundant in cultivated organisms and wildtype females' samples, respectively  
214 (Figure 2b); whereas *Clostridium sensu stricto* (13.53 %) was more abundant in wildtype males'  
215 samples. The cultivated and wildtype organisms' samples are dominated by the *Fusobacteria*  
216 (38.95 %) and *Firmicutes* (19.57 %) phyla, respectively (Figure 2a). For the *Cetobacterium* (38.95 %)  
217 and *Clostridium sensu stricto* (15.09 %) genera they are more abundant in the cultured organisms  
218 and samples of wildtype organisms' samples, respectively (Figure 2b).

219 Likewise, the core microbiome composition at phylum and genus taxonomic levels, on a per-  
220 sample basis of adults' *A. tropicus* gut (figure 3), shows that the most abundant phyla per sample  
221 were *Fusobacteria* (47.01 %), *Proteobacteria* (29.02 %) and *Firmicutes* (12.90 %) (Figure 3a), while  
222 the most abundant genera were *Cetobacterium* (47.01 %), *Edwardsiella* (12.00 %) and *Serratia* (10.55  
223 %) (Figure 3b). Although the primers are designed only to 16S rRNA gene amplify of bacteria,  
224 OTUs belonging to the archaea domain were also identified, represented by the genera  
225 *Salinirubrum*, *Salinigranum* and *Methanoculleus*, which together represent about 0.01 % of the total  
226 abundance.

227 *Alpha diversity.* In this work, diversity, dominance and richness were evaluated using the Shannon  
228 index about the total number of OTUs. Microbiota composition is influenced by source and sex

229 factors. The Shannon index indicates that the microbial types in adults' *A. tropicus* are more  
230 evenly distributed and thus may be more diverse in wild ( $5.32 \pm 0.13$  SD) and cultivated ( $3.75 \pm$   
231  $0.09$  SD) female individuals than in the wild ( $3.14 \pm 0.07$  SD) and cultivated ( $3.38 \pm 0.08$  SD) male  
232 individuals (Table 3). We found significant differences in diversity indices and only some samples  
233 were not significant. The wild and cultivated females turned out to be the most diverse, but by  
234 origin, only the wild samples were the most diverse. In a total of 50 taxa, significant differences  
235 can be observed between cultivated and wild conditions.

236 *Beta diversity.* Bacterial communities beta diversity associated to TGI of adults' *A. tropicus* in origin  
237 conditions were measured through the ordination analysis from Principal Coordinates Analysis  
238 (PCoA), using Unweighted unifrac distances (UniFrac). The analysis produced an ordination of  
239 the dissimilarities, where similar individuals are close to one another and dissimilar ones are  
240 more distant (Figure 4). All ordination analysis showed a clear separation between wild and  
241 cultivated individuals samples. ANOSIM statistic (R: 0.60933; p-value <0.002) found significant  
242 statistical differences by origin, between the cultivated and wild groups (Figure 4).

243 *Significant microbial components associated with the origin and sex.* 8 genera were identified in wild  
244 organisms and these are *Methanoculleus*, *Flavobacterium*, *Psychrobacter*, *Acinetobacter*, *Pseudomonas*,  
245 *Paracoccus*, *Massilia* and *Shewanella*. Likewise, 13 genera were identified in cultivated organisms,  
246 which are *Paludibacter*, *Intestinibacter*, *Cellulosilyticum*, *Odoribacter*, *Turicibacter*, *Defluviitalea*,  
247 *Vallitalea*, *Acetivibrio*, *Terrisporobacter*, *Bacteroides*, *Acidaminobacter*, *Sporacetigenium* and  
248 *Macellibacteroides*.

249 Specific taxa distributed differentially between wild and cultivated organisms were identified by  
250 LEfSe tool. This allows to obtain statistical differences per each taxon, where linear discriminant  
251 analysis (LDA) score barplot is shown for both conditions, cultivated and wild organisms (female  
252 & male; figure 5a), cultivated and wild organisms (female; figure 5b), male organisms, cultivated  
253 & wild (Figure 6a), cultivated female organisms (Figure 6b) and wild female organisms (Figure 6c),  
254 representing each phylum, class, order, family and genus by a histogram.

255 *Phylogenetic reconstruction analysis.* The sequences-base of rRNA 16S gene constructed of some  
256 organisms found in the literature with probiotic potential in fish, according to table 1, allowed us  
257 to find and identify possible organisms with probiotic potential in microbiome gut of adults' *A.*  
258 *tropicus*, adjusted to 99% identity and 70% coverage. In figure 7 we obtained a phylogenetic tree  
259 based on the identified sequences of the most abundant phyla per sample, such as Fusobacteria,  
260 Proteobacteria and Firmicutes. Besides, we *Methanosarcina thermophila* and *Archaeoglobus profundus*  
261 sequences data used thermophilic methanogens and sulfate-reducing archaea, respectively, as  
262 outgroups for the root identification, considering that they may be related only distantly with  
263 identified sequences in our work.

264 In phylogenetic tree reconstruction (Figure 7) we determined that the evolutionary conclusion of  
265 these relationships is that the two species of archaea or outgroups selected are ancestors of the nine  
266 species or ingroups identified with blue squares. Likewise, they belong to the three most dominant  
267 of phyla groups that integrate the core microbiome gut in adults' *A. tropicus*. On the other hand,  
268 these nine species, identified by blue squares, are those that have probiotic potential.

269 **4. Discussion.** We obtained the 16S rRNA Gene Amplicons preparation with high-throughput  
270 sequencing using Illumina MiSeq platform by Research & Testing Labs (Lubbock, Texas, USA)  
271 services, facilitating discovery and analysis of rare taxa and detection of previously unrecognized  
272 eukaryotic and prokaryotic microbiome (Paul *et al.* 2018). In this sense, we identified and compared,  
273 by indexes attachment of multiplexing samples and readings of sequencing products for 2x300 bp

274 paired-end, the core microbiome and microbial diversity, respectively, in the gut of adults' *A.*  
275 *tropicus* by origin and sex.

276 Previous studies have shown that the fish gut hosts an estimated  $10^7$  to  $10^{11}$  bacteria per gram  
277 intestinal content (Nayak 2010) and the bacterial colonizers in fish gut include Proteobacteria,  
278 Fusobacteria, Firmicutes, Bacteroidetes, Actinobacteria, Clostridia, Bacilli and Verrucomicrobia  
279 (Ringø *et al.* 2006, Desai *et al.* 2012, Li *et al.* 2013a,b, Carda-Diéguez *et al.* 2014, Ingerslev *et al.* 2014a,b)  
280 with the first 4 being the most abundant, depending on environmental conditions and the host's  
281 diet (Wang *et al.* 2017). Almost all Proteobacteria, Fusobacteria, Firmicutes, Bacteroidetes and  
282 *Deinococcus-Thermus* 16S rRNA sequences that we detect in CGMB of adults' *A. tropicus* belonged  
283 to the *Cetobacterium*, *Edwardsiella*, *Serrartia* and *Clostridium sensu stricto* genres. The observed  
284 bacterial profiles in the gut of adults' *A. tropicus*, by sex and origin, may reflect specific central  
285 microbiota, beyond the differences most likely attributable to feeding behavior. At the phylum  
286 level, almost 90 % of the total bacterial abundance only we were classified into total four phyla.  
287 Among these phyla, Proteobacteria and Fusobacteria were dominant in the fifteen fish species  
288 samples, female/male and cultivated/wild (Figs. 2, 3). The inferred physiological roles of the  
289 dominant prokaryotes are related to the metabolism of carbohydrates and nitrogenous compounds  
290 (Kormas *et al.* 2014). In contrast, dominant microbiota of marine fish is facultative anaerobes,  
291 including *Vibrio*, *Pseudomonas*, *Acinetobacter*, *Corynebacterium*, *Alteromonas*, *Flavobacterium* and  
292 *Micrococcus* (Onarheim *et al.* 1994, Blanch *et al.* 1997, Verner-Jeffreys *et al.* 2003).

293 Considering the above-mentioned, fish core gut microbiota (CGMB) can influence nutrition,  
294 growth, reproduction, general population dynamics and the host's vulnerability to diseases thus  
295 supporting a crucial role in aquaculture practice (Ghanbari *et al.* 2015). Current DNA sequencing  
296 technologies and bioinformatic analysis have contributed towards a deeper understanding of the  
297 complex microbial communities associated to diverse habitats, including CGMB of fish in response  
298 to a variety of factors affecting the host, including temperature variations, salinity, growth stage,  
299 digestive physiology and feeding strategy (Cahill 1990, Jammal *et al.* 2017). The concept 'core  
300 microbiota' referred to a set of abundant microbial lineages that are shared by all individuals from  
301 the same species (Wong *et al.* 2013). The concept of CGMB has been explored both in mammalian  
302 host's context and in freshwater fish (Turnbaugh *et al.* 2009, Roeselers *et al.* 2011, Nam *et al.* 2011,  
303 Wu *et al.* 2012, Wong *et al.* 2013).

304 On the other hand, Alpha diversity results indicate that the greatest gut microbiota abundance and  
305 richness is found in adults' *A. tropicus* wildtype female, rather than adult's wildtype males and the  
306 least gut microbiota abundance and richness is found in adults *A. tropicus*, female or male cultivated  
307 (Table 3). Ley *et al.* (2008) concluded that gut microflora of herbivorous mammals have the greatest  
308 richness and phylogenetic diversity and that both richness and phylogenetic diversity decreased  
309 among omnivores and decreased further among carnivores. We found the lowest richness and  
310 phylogenetic diversity (Table 3) in gut microbiomes from adults *A. tropicus* defined as top  
311 piscivores (carnivores; e.g., cultivated female and male *A. tropicus*). Indeed, MacFarlane *et al.* (1986)  
312 observed that farmraised fish had a simpler gut flora than their wild counterparts.

313 Likewise, our coefficients of similarity or dissimilarity of unweighted unifracs distances (UniFrac)  
314 by PCoA ordination analysis, indicate that gut microbiota of wild and cultivated adults *A. tropicus*  
315 are only similar by two wild samples and one cultivated and dissimilarity by most of the wild and  
316 cultivated samples (Figure 4). Principal coordinate analysis (PCoA) revealed that gut bacterial  
317 communities from adults' *A. tropicus* by origin formed different clusters. Cultivated and wild  
318 organisms formed distinctly clusters in PCoA space (Figure 4), suggesting that the enrichment and  
319 diversity of gut microbiota are affected by the origin. This result is similar to the research of Ni *et*

320 *al.* (2012) that the origin and host phylogeny they are quite related to the composition of adults' *A.*  
321 *tropicus* gut bacteria. Moreover, previous studies have shown that the microbiotic diversity content  
322 in all intestinal sections depends on the fish size (Moran *et al.* 2005, Bolnick *et al.* 2014, Clements *et*  
323 *al.* 2014).

324 Numerous works have built on this, demonstrating that many species of herbivorous and  
325 omnivorous fishes contain diverse intestinal communities (Rimmer & Wiebe 1987, Clements *et al.*  
326 1989, Clements 1991, 1997, Martínez-Díaz & Pérez-España 1999, Ray *et al.* 2012) and that  
327 herbivorous and detritivorous fish species harbour distinctive microbial populations (Clements *et*  
328 *al.* 2014). Feeding habits are also an important factor that generally influences the microbial  
329 diversity in the fish CGMB, displaying a higher diversity in the following order: carnivores>  
330 omnivores> herbivores (Ward *et al.* 2009, Larsen *et al.* 2014, Li *et al.* 2014a,b, Miyake *et al.* 2015, Liu  
331 *et al.* 2016). He *et al.* (2013) study revealed that the herbivorous carp (*Ctenopharyngodon idellus*)  
332 reported a wider variety of bacterial species than the dark carnivorous carps and Gibel (*Carassius*  
333 *gibelio*) which are exclusively omnivorous, and also the sea bream, under the same culture  
334 conditions. This same tendency we identify in gut core microbiome of adults *A. tropicus* by sex and  
335 origin, because although these are omnivores, they prefer carnivorous habits. (Méndez-Marín *et al.*  
336 2012, Figure 5a). At the sex level, we observed that core microbiome is more diverse in female  
337 organisms, and particularly in wild type organisms (5b, 6a,b)

338 More recent sequence-based approaches show that fish hindgut microbial communities much more  
339 closely resemble those of mammals than environmental microbial communities (Fidopiastis *et al.*  
340 2006; Sullam *et al.* 2012), especially in the prevalence of Proteobacteria, Firmicutes and Bacteroidetes  
341 (Clements *et al.* 2007, Smriga *et al.* 2010, Sullam *et al.* 2012, Ye *et al.* 2014). These findings indicate  
342 that fish, like other vertebrates, harbour specialized gastrointestinal communities (Clements *et al.*  
343 2014). We identified Proteobacteria as the most dominant phylum in gut core microbiome of the  
344 adults' *A. tropicus*. According to Rudi *et al.* (2018), Proteobacteria phylum is very characteristic in  
345 wildtype fish and denotes of a diet high in fat presence.

346 We identified Fusobacteria as the second dominant phylum in the gut of the male adults *A. tropicus*,  
347 wild and cultivated (Figure 2a). A few studies have shown Fusobacteria as dominant members of  
348 the gut microbiota of freshwater fishes (van Kessel *et al.* 2011, Di Maiuta *et al.* 2013). Fusobacteria is  
349 anaerobic, Gram-negative bacilli that produce butyrate (Bennett and Eley 1993), a short-chain fatty  
350 acid that is often the end product of the fermentation of carbohydrates including those found in  
351 mucins (Titus and Ahearn 1988, von Engelhardt *et al.* 1998). In mammals, butyrate provides many  
352 benefits to the host, including providing a majority of the energy supply to gastrointestinal cells  
353 (von Engelhardt *et al.* 1998, Collinder *et al.* 2003), enhancing mucus production, acting as an anti-  
354 carcinogen and anti-inflammatory, as well as playing a role in satiation (McBain *et al.* 1997, von  
355 Engelhardt *et al.* 1998, Andoh *et al.* 1999, Hamer *et al.* 2007). This fatty acid has been found in the  
356 gut of herbivorous and omnivorous fishes only (Clements *et al.* 1994, Clements and Choat 1995).  
357 Nuez-Ortin *et al.* (2012) demonstrated that the ability of butyric acid to inhibit potential freshwater  
358 fish pathogens, and sodium butyrate is currently sold as a food additive to promote fish health and  
359 growth. However, trials using blends of sodium butyrate and other additives have not proven  
360 beneficial (Owen *et al.* 2006, Gao *et al.* 2011).

361 OTUs sequences of the *Cetobacterium* genus were identified as dominant mainly in gut microbiome  
362 of the adults' *A. tropicus*, wild and cultivated male organisms. *Cetobacterium* genus is widely  
363 identified in freshwater and warm water fish species (Tsuchiya *et al.* 2007, Larsen *et al.* 2014, Li *et*  
364 *al.* 2017). *Cetobacterium* genus members' presence can perform fermentative metabolism of peptides  
365 and carbohydrates and produce vitamin B12 (cobalamin) (Larsen *et al.* 2014). *Cetobacterium* and



366 *Bacteroides* were reported as major producers of the vitamin B12 in the intestine (Tsuchiya *et al.*  
367 2008, Vogiatzoglou *et al.* 2009) and they were the dominant genera in grass carp's intestine, with  
368 the abundance of more than 50 % (Li *et al.* 2015a). Animals, plants and fungi are incapable of  
369 cobalamin production and it is the only vitamin that is exclusively produced by microorganisms,  
370 particularly by anaerobes (Roth *et al.* 1996, Martens *et al.* 2002, Smith *et al.* 2007). Qi *et al.* (2017)  
371 showed that different concentrations of ammonia would affect the abundance of *Bacteroides* and  
372 *Cetobacterium* in gut fish, and the higher the concentration, the lower the abundance.

373 Despite we detected OTUs of Deinococcus-Thermus bacterial phyla non-dominant ( $0.003 \pm 0.006$   
374 SD) in gut microbiome of the adults' *A. tropicus*, wildtype males only. However, Deinococcus-  
375 Thermus species are known for their resistance to extreme stresses, such as radiation, oxidation,  
376 desiccation and high temperature (Li *et al.* 2015b). The deeply branching Deinococcus-Thermus  
377 lineage is recognized as one of the most extremophilic phylum of bacteria (Theodorakopoulos *et al.*  
378 2013). Sequence information from Deinococcus-Thermus phylum is presently available for only a  
379 limited number of species. However, the sequenced genomes include species from both the main  
380 families (i.e., *Deinococcaceae* and *Thermaceae*) within this phylum (Griffiths & Gupta 2007). In recent  
381 years, researchers have begun using Deinococcus spp in biotechnologies and bioremediation due  
382 to their specific ability to grow and express novel engineered functions. More recently, the  
383 sequencing of several Deinococcus spp and comparative genomic analysis have provided new  
384 insight into the potential of this genus. Features such as the accumulation of genes encoding cell  
385 cleaning systems that eliminate organic and inorganic cell toxic components are widespread among  
386 Deinococcus spp. Other features such as the ability to degrade and metabolize sugars and  
387 polymeric sugars make Deinococcus spp. an attractive alternative for use in industrial  
388 biotechnology (Gerber *et al.* 2015). That is why their functional role in the gut of the adults' *A.*  
389 *tropicus* deserves further research.

390 Bacteroidetes is a phylum composed of three large classes of Gram-negative, nonsporeforming,  
391 anaerobic or aerobic, and rod-shaped bacteria that are widely distributed in the environment,  
392 including in soil, sediments, and seawater, as well as in the guts and on the skin of animals (Ley *et al.*  
393 2008), this was also present as the dominant phylum in adults *A. tropicus* female, wild and  
394 cultivated, usually; only this type of bacteria was detected as dominant in sample 4, cultivated male  
395 organism (Figure 2a). Likewise, a large part of the proteins synthesized by the genome of  
396 *Bacteroides*, a genus of Bacteroidetes, can break down polysaccharides and metabolize their sugars,  
397 playing a fundamental role in the degradation of complex molecules in the gut of the host. Their  
398 ability to harvest alternative energy sources from food could allow *Bacteroides* to be more  
399 competitive than other bacteria in CGMB of fish during starvation stage (Xu *et al.* 2003, Xia *et al.*  
400 2014).

401 We identify *Clostridium sensu stricto* genus sequences in GMB of the adults' *A. tropicus*, wildtype  
402 males only. This genus has also been identified in GMB of carp fish (Li *et al.* 2015a). The members  
403 of the genera *Clostridium sensu stricto* that are dominant in the intestinal microbiota of grass carp  
404 (*Ctenopharyngodon idellus*), they are also versatile in their ability to utilise various polysaccharides,  
405 such as cellulose, xylan and hemicelluloses, which constitute the major part of vegetal fibres (Uffen  
406 1997, Uz & Ogram 2006, Li *et al.* 2015a). Others also include not only species with saccharolytic and  
407 fiber-fermenting activities but also proteolytic species (Lubbs *et al.* 2009, Pikuta *et al.* 2009, Li *et al.*  
408 2015a).

409 *Serratia*, *Edwardsiella*, *Plesiomonas* and *Reyranella* are genera belonging to Enterobacteriaceae family  
410 and Proteobacteria phylum. This isolated bacterial species are facultative pathogens for fish and  
411 humans and may be isolated from fish without apparent symptoms of the disease (Walczak *et al.*

412 2017). *Serratia* produces serrawettin that acts as a wetting agent to reduce the surface tension of the  
413 environment (Chan *et al.* 2013). *Edwardsiella* has been isolated from tortoises (Iveson 1971),  
414 crocodiles (Iveson 1971), aquarium water (Bartlett *et al.* 1977) and from seagull roosting areas (Berg  
415 & Anderson 1972). *Edwardsiella* was isolated on several occasions during the examination of dressed  
416 catfish for *Salmonella* (Wyatt *et al.* 1979). This report provides information on the isolation,  
417 identification, and incidence of *Edwardsiella* in freshwater catfish and their environment. There are  
418 many unanswered questions regarding their importance in freshwater fish. Liu *et al.* (2015) are  
419 reports of pathogenicity of *Plesiomonas shigelloides* to fish. *P. shigelloides* can occur as natural  
420 intestinal flora of fish, but in case of stress conditions, the following symptoms are observed:  
421 darkening of body, hemorrhaging, fin rotting, ascitic fluid in the abdominal cavity, and lesions in  
422 internal organs (Liu *et al.* 2015). Phylogenetically, *Reyranella* genus has an evolutionary lineage  
423 within the family Rhodospirillaceae in the class Alphaproteobacteria. The type species *Reyranella*  
424 *massiliensis* was originally identified by Pagnier *et al.* (2011). Subsequently, Kim *et al.* (2013)  
425 emended several characteristics (e.g., nitrate reduction, respiratory quinone information) into the  
426 genus description, and more recently, Cui *et al.* 2017 found that reduction of nitrate to nitrite is  
427 variable, the predominant isoprenoid quinone is ubiquinone-10 (Q-10), major polar lipids are PME,  
428 DPG, PG, PE and one unknown aminolipid. We detect these genera mainly in gut microbiome of  
429 the adults' *A. tropicus*, wildtype females and cultivated females and males organisms (Figures 2b,  
430 3b). We assume that, although commonly known for their ability to cause deadly infectious  
431 diseases, this is populations of bacteria (identified as normal flora of the adults *A. tropicus*), which  
432 despite symbiotically living on and between wildtype females and cultivated females and males  
433 organisms of the adults' *A. tropicus*, really have a positive impact on host survival (Figures 2b, 3b).

434 *Paludibacter* genus was found exclusively in African microbiota. This is probably due to their  
435 increased fitness to grow on polysaccharides abundant in xylan or cellulose diets (De Filippo *et al.*  
436 2010, Thomas *et al.* 2011). We identified OTUs of *Paludibacter* genus in core gut microbiome of the  
437 adults' *A. tropicus*, females and males cultivated organisms, only (Figure 2b).

438 In phylogenetic trees reconstruction (Figure 7) and according to Table 1, we identified the species  
439 *Lactococcus lactis* strains CAU929 and CAU6600, Cp6 and CAU9951, *Cetobacterium* strain H69,  
440 *Aeromonas hydrophila* strains P5 and WR-5-3- 2, *Aeromonas sobria* strain CP DC28 and *Aeromonas*  
441 *hydrophila* with probiotic potential within the three dominant phyla in core gut microbiome of the  
442 adults *A. tropicus*.

443 **5. Conclusions.** We conclude that adults' *A. tropicus* core gut microbiome is constituted by  
444 Proteobacteria, Fusobacteria, Firmicutes and Bacteroidetes phyla. Definitely, diversity and richness  
445 in core gut microbiome are higher of the female than males' organisms and wild than cultivated  
446 organisms of the adults' *A. tropicus*. We can also suppose that *Serratia*, *Edwardsiella*, *Plesiomonas* and  
447 *Reyranella* genera lives in symbiosis and has a positive impact on the survival of the adults' *A.*  
448 *tropicus*. There is great potential in the biotechnology industry with Deinococcus-Thermus phylum,  
449 due to its extremophile capacity. Further, adults' *A. tropicus* by sex and origin have been adapting  
450 to the environment and the diet due to their great capacity to saccharolytic, fiber fermentation and  
451 starvation activities. Finally, we can confirm that nine species can be found with the probiotic  
452 potential of 3 phyla that shape up the core gut microbiome of the adults *A. tropicus*. The CGMB of  
453 *A. tropicus* is increasingly regarded as an integral component of the host, due to important roles in  
454 the modulation of the immune system, the proliferation of the intestinal epithelium and the  
455 regulation of the dietary energy intake. Understanding the factors that influence the composition  
456 of these microbial communities is essential to health management, and the application to aquatic  
457 animals still requires basic investigation.

458 **Conflict of Interest**

459 The authors declare no conflict of interest.

460 **Acknowledgments**

461 The authors thanks the National Council of Science and Technology of Mexico for the thesis  
462 scholarship for postgraduate studies and the mixed scholarship granted to carry out the research  
463 stay at the University of Valencia (Spain). This research received external funding from the National  
464 Council of Science and Technology of Mexico “Strengthening of the Master’s Degree in  
465 Environmental Sciences for its Permanence in the National Register of Quality Graduates of  
466 CONACYT TAB-2014-C29-245836 key” and the project “Estudio de la fisiología digestiva en larvas  
467 y juveniles de pejelagarto (*Atractosteus tropicus*) con base en técnicas histológicas, bioquímicas y  
468 moleculares” CB-2016-01-282765 key.

469 **References**

- 470 Al-Harbi AH, Uddin N (2004) Seasonal variation in the intestinal bacterial flora of hybrid tilapia  
471 (*Oreochromis niloticus*, *Oreochromis aureus*) cultured in earthen ponds in Saudi Arabia.  
472 *Aquaculture* 229: 37 – 44.
- 473 Al-Harbi AH, Uddin N (2005). Bacterial diversity of tilapia (*Oreochromis niloticus*) cultured in  
474 brackish water in Saudi Arabia. *Aquaculture*, 250: 566 – 572.
- 475 Andoh A, Bamba T, Sasaki M (1999). Physiological and anti-inflammatory roles of dietary fiber and  
476 butyrate in intestinal functions. *JPEN J Parenter Enteral Nutr* 23: S70 – S73.
- 477 Aschfalk A, Müller W (2002) Clostridium perfringens toxin types from wild-caught Atlantic cod  
478 (*Gadus morhua* L.), determined by PCR and ELISA. *Can J Microbiol* 48:365–368.
- 479 Austin B, Austin DA (2016) *Bacterial Fish Pathogens: Disease of Farmed and Wild Fish*. Springer  
480 Sixth Edition. 259 pp. Doi: 10.1007/978-3-319-32674-0
- 481 Avila-Villa LA, Martínez-Porchas M, Gollas-Galván T, López-Elías JA, Mercado L, Murguía-López  
482 A, et al. (2011). Evaluation of different microalgae species and *Artemia* (*Artemia franciscana*)  
483 as possible vectors of necrotizing hepatopancreatitis bacteria. *Aquaculture* 318: 273 – 276.
- 484 Bartlett KH, Trust TJ, Lior H (1977). Small pet aquarium frogs as a source of *Salmonella*. *Appl.*  
485 *Environ. Microbiol.* 33: 1026 – 1029.
- 486 Bennett KW, Eley A (1993). *Fusobacteria* – new taxonomy and related diseases. *J Med Microbiol* 39:  
487 246 – 254.
- 488 Berg RW, Anderson AW (1972). *Salmonellae* and *Edwardsiella tarda* in gull feces: a source of  
489 contamination in fish processing plants. *Appl. Microbiol.* 24: 501 – 503.
- 490 Blanch A, Alsina M, Simon M, Jofre J (1997). Determination of bacteria associated with reared turbot  
491 (*Scophthalmus maximus*) larvae. *Journal of Applied Microbiology* 82: 729 – 734.
- 492 Bolnick BI, Snowberg LK, Hirsch PE, Lauber CHL, Knight R, Caporaso JG, Svanbäck R (2014).  
493 Individuals’ diet diversity influences gut microbial diversity in two freshwater fish

- 494 (threespine stickleback and Eurasian perch). *Ecology Letters*, 17: 979 – 987.  
495 <https://doi.org/10.1111/ele.12301>
- 496 Bondad MG, Subasinghe RP, Arthur JR (2005). Disease and health management in Asian  
497 aquaculture. *Veterinary parasitology*, vol. 132, no. 3-4, pp. 249 – 272.
- 498 Boutin S, Bernatchez L, Audet C, Derôme N (2012). Antagonistic effect of indigenous skin bacteria  
499 of brook charr (*Salvelinus fontinalis*) against *Flavobacterium columnare* and *F.*  
500 *psychrophilum*. *Vet. Microbiol.* 155: 355 – 361.  
501 <https://doi.org/10.1016/j.vetmic.2011.09.002>
- 502 Brunt J, Austin B (2005). Use of a probiotic to control lactococcosis and streptococcosis in rainbow  
503 trout, *Oncorhynchus mykiss* (Walbaum). *J Fish Dis* 28: 693–701.
- 504 Bussing WA (1998). *Peces de las aguas continentales de Costa Rica*. Ed. Univ. Costa Rica. 271 p.
- 505 Cahill M (1990). Bacterial flora of fishes: A review. *Microbial Ecology*, 19: 21 – 41.  
506 <https://doi.org/10.1007/BF02015051>
- 507 Carda-Diéguez M, Mira A, Fouz B (2014). Pyrosequencing survey of intestinal microbiota diversity  
508 in cultured sea bass (*Dicentrarchus labrax*) fed functional diets. *FEMS Microbiology Ecology*  
509 87: 451 – 459.
- 510 Chan XY, Chang CY, Hong KW, Tee KK, Yin WF, Chan KG (2013). Insights of biosurfactant  
511 producing *Serratia marcescens* strain W2.3 isolated from diseased tilapia fish: a draft genome  
512 analysis *Gut Pathogens*, 5: 29. <https://doi.org/10.1186/1757-4749-5-29>
- 513 Clements KD, Sutton DC, Choat JH (1989). The occurrence and characteristics of unusual protistan  
514 symbionts from surgeonfishes (F. Acanthuridae) of the Great Barrier Reef, Australia.  
515 *Marine Biology*, 102: 403 – 412.
- 516 Clements KD (1991). Endosymbiotic communities of two herbivorous labroid fishes, *Odax*  
517 *cyanomelas* and *O. pullus*. *Marine Biology*, 106: 223 – 229.
- 518 Clements KD, Gleeson VP, Slaytor M (1994). Shortchain fatty-acid metabolism in temperate marine  
519 herbivorous fish. *J Comp Physiol B*. 164: 372 – 377.
- 520 Clements KD Choat JH (1995). Fermentation in tropical marine herbivorous fishes. *Physiol Zool*.  
521 68: 355 – 378.
- 522 Clements KD (1997). Fermentation and gastrointestinal microorganisms in fishes. In:  
523 *Gastrointestinal Microbiology*. Vol. 1: *Gastrointestinal Ecosystems and Fermentations* (eds  
524 Mackie RI, White BA), pp. 156–198. Chapman and Hall, New York.
- 525 Clements KD, Pasch IBY, Moran D, Turner SJ (2007). Clostridia dominate 16S rRNA gene libraries  
526 prepared from the hindgut of temperate marine herbivorous Fishes. *Mar. Biol.* 150: 1431 –  
527 1440. <https://doi.org/10.1007/s00227-006-0443-9>
- 528 Clements KD, Angert ER, Montgomery WL, Choat JH (2014). Intestinal microbiota in fishes: what's  
529 known and what's not. *Molecular Ecology*, 23: 1891 – 1898.  
530 <https://doi.org/10.1111/mec.12699>

- 531 Collinder E, Bjornhag G, Cardona M, Norin E, Rehbinder C, Midtvedt T (2003). Gastrointestinal  
532 host-microbial interactions in mammals and fish: comparative studies in man, mice, rats,  
533 pigs, horses, cows, elk, reindeer, salmon and cod. *Microb Ecol Health Dis* 15: 66 – 78.
- 534 Cui Y, Chun SJ, Ko SR, Lee HG, Srivastava A, Oh HM, Ahn CY (2017). *Reyranella aquatilis* sp. nov.,  
535 an alphaproteobacterium isolated from a eutrophic lake. *Int J Syst Evol Microbiol*,  
536 67: 3496 – 350. <https://doi.org/10.1099/ijsem.0.00215>
- 537 De Filippo C, Cavalieri D, Di Paola M, Ramazzotti M, Poullet JB, Massart S, Collini S, Pieraccini G,  
538 Lionetti P (2010). Impact of diet in shaping gut microbiota revealed by a comparative study  
539 in children from Europe and rural Africa. *Proc. Natl. Acad. Sci. U.S.A.* 107: 14691 – 14696.
- 540 Desai AR, Links MG, Collins SA, Mansfield GS, Drew MD, Van Kessel AG et al. (2012). Effects of  
541 plant-based diets on the distal gut microbiome of rainbow trout (*Oncorhynchus mykiss*).  
542 *Aquaculture* 350: 134 – 142.
- 543 Di Maiuta N, Schwarzentruher P, Schenker M, Schoelkopf J (2013). Microbial population dynamics  
544 in the faeces of wood-eating loricariid catfishes. *Lett Appl Microbiol* 56, 401 – 407.
- 545 von Engelhardt W, Bartels J, Kirschberger S, Duttingdorf HDMZ, Busche R (1998). Role of short-  
546 chain fatty acids in the hind gut. *Vet Q* 20: S52 – S59.
- 547 FAO (2014). *The State of World Fisheries and Aquaculture*. Roma.
- 548 FAO (2017). *The State of World Fisheries and Aquaculture*. Roma.
- 549 Ferguson RL, Buckley E, Palumbo A (1984). Response of marine bacterioplankton to differential  
550 filtration and confinement. *Appl Environ Microbiol* 47: 49–55.
- 551 Fidopiastis P, Bezdek D, Horn M, Kandel J (2006). Characterizing the resident, fermentative  
552 microbial consortium in the hindgut of the temperate-zone herbivorous fish, *Hermosilla*  
553 *azurea* (Teleostei: Kyphosidae). *Mar Biol*, 148: 631 – 642. [https://doi.org/10.1007/s00227-005-](https://doi.org/10.1007/s00227-005-0106-2)  
554 [0106-2](https://doi.org/10.1007/s00227-005-0106-2)
- 555 Flores-Nava A, Brown A (2010). Peces nativos de agua dulce de América del Sur de interés para la  
556 acuicultura: Una síntesis del estado de desarrollo tecnológico de su cultivo. *Serie*  
557 *Acuicultura en Latinoamérica*, FAO, 1: 3.
- 558 Frías-Quinatana CA, Marquez-Couturier G, Alvarez-González CA, Tovar-Ramírez D, Nolasco-  
559 Soria H, Galaviz-Espinosa M, Martínez-García R, Camarillo-Coop S, Martínez-Yáñez R,  
560 Gisbert E (2015). Development of digestive tract and enzyme activities during the early  
561 ontogeny of the tropical gar *Atractosteus tropicus*. *Fish Physiol Biochem* 41:1075–1091.
- 562 Gao YL, Storebakken T, Shearer KD, Penn M, Overland M (2011). Supplementation of fishmeal and  
563 plant protein-based diets for rainbow trout with a mixture of sodium formate and butyrate.  
564 *Aquaculture*, 311: 233–240.
- 565 Gerber E, Bernard R, Castang S, Chabot N, Coze F, Dreux-Zigha A, Hauser E, Hivin P, Joseph P,  
566 Lazarelli C, Letellier G, Olive J, Leonetti JP (2015). *Deinococcus* as new chassis for industrial  
567 biotechnology: biology, physiology and tools. *Journal of Applied Microbiology*, 119: 1 – 10.  
568 <https://doi.org/10.1111/jam.12808>

- 569 Ghanbari M, Kneifel W, Domig KJ (2015). A new view of the fish gut microbiome: Advances from  
570 next-generation sequencing. *Aquaculture* 448: 464 – 475.  
571 <https://doi.org/10.1016/j.aquaculture.2015.06.033>
- 572 Gianoulis TA, Raes J, Patel PV, Bjornson R, Korbel JO, Letunic I, et al. (2009). Quantifying  
573 environmental adaptation of metabolic pathways in metagenomics. *Proceedings of the*  
574 *National Academy of Sciences*, 106: 1374 – 1379.
- 575 Givens CE (2012). A fish tale: comparison of the gut microbiome of 15 fish species and the influence  
576 of diet and temperature on its composition. Thesis of Philosophy. University of Georgia.  
577 Pp 10 – 229.
- 578 Griffiths E, Gupta RS (2007). Identification of signature proteins that are distinctive of the  
579 *Deinococcus-Thermus* phylum. *International Microbiology*, 10: 201 – 208.  
580 <https://doi.org/10.2436/20.1501.01.28>
- 581 Hamer H, Jonkers D, Troost FJ, Bast A, Vanhoutvin S, Venema K, Brummer RJ (2007). Butyrate  
582 modulates oxidative stress in the colonic mucosa of healthy humans. *Gastroenterology* 132,  
583 A79.
- 584 Head IM, Saunders JR, Pickup RW (1998) Microbial evolution, diversity, and ecology: a decade of  
585 ribosomal RNA analysis of uncultivated microorganisms. *Microb Ecol* 35: 1–21.
- 586 Ingerslev HC, Strube ML, von Gersdorff Jørgensen L, Dalsgaard I, Boye M, Madsen L (2014a). Diet  
587 type dictates the gut microbiota and the immune response against *Yersinia ruckeri* in  
588 rainbow trout (*Oncorhynchus mykiss*). *Fish & Shellfish Immunology* 40: 624–633.
- 589 Ingerslev HC, von Gersdorff Jørgensen L, Strube ML, Larsen N, Dalsgaard I, Boye M et al. (2014b).  
590 The development of the gut microbiota in rainbow trout (*Oncorhynchus mykiss*) is affected  
591 by first feeding and diet type. *Aquaculture* 424: 24 – 34.
- 592 Irianto A, Austin B (2002a). Use of probiotics to control furunculosis in rainbow trout, *Oncorhynchus*  
593 *mykiss* (Walbaum). *Journal of Fish Diseases*, 25: 333 – 342.
- 594 Irianto A, Austin B (2002b). Use of probiotics to control furunculosis in rainbow trout, *Oncorhynchus*  
595 *mykiss* (Walbaum). *J. Fish Dis.* 25: 1 – 10. <https://doi.org/10.1046/j.1365-2761.2002.00375.x>
- 596 Iveson JB (1971). Strontium chloride B and E. E. broth media for the isolation of *Edwardsiella*,  
597 *Salmonella* and Arizona species from tiger snakes. *J. Hyg.* 69: 323 – 330.
- 598 Izvekova GI, Izvekov E, Plotnikov A (2007). Symbiotic microflora in fishes of different ecological  
599 groups. *Biol Bull* 34: 610 – 618.
- 600 Jammal A, Bariche M, zu Dohna H, Kambris Z (2017). Characterization of the Cultivable Gut  
601 Microflora in Wild-Caught Mediterranean Fish Species. *Current Nutrition & Food Science*,  
602 13:147-154. <https://doi.org/10.2174/1573401313666170216165332>
- 603 Joborn A, Dorsch M, Olsson JC, Westerdahl A, Kjelleberg S (1999). *Carnobacterium inhibens* sp nov.,  
604 isolated from the intestine of Atlantic salmon (*Salmo salar*). *Int. J. Syst. Bacteriol.* 49: 1891 –  
605 1898.

- 606 van Kessel MA, Dutilh BE, Neveling K, Kwint MP, Veltman MP, Flik G, Jetten MS, Klaren PH *et al.*  
607 (2011). Pyrosequencing of 16S rRNA gene amplicons to study the microbiota in the  
608 gastrointestinal tract of carp (*Cyprinus carpio* L.). *AMB Express* 1, 41
- 609 Kim SJ, Ahn JH, Lee TH, Weon HY, Hong SB *et al.* (2013). *Reyranella soli* sp. nov., isolated from  
610 forest soil, and emended description of the genus *Reyranella* Pagnier *et al.* 2011. *Int J Syst*  
611 *Evol Microbiol*, 63: 3164 – 3167.
- 612 Klindworth A, Pruesse E, Schweer T, Peplies J, Quast Ch, Horn M, Oliver Glöckner FO (2013).  
613 Evaluation of general 16S ribosomal RNA gene PCR primers for classical and next-  
614 generation sequencing-based diversity studies. *Nucleic Acids Research*, 41:1–11.  
615 <https://doi.org/10.1093/nar/gks808>
- 616 Kormas KA, Meziti A, Mente E, Frentzos A (2014). Dietary differences are reflected on the gut  
617 prokaryotic community structure of wild and commercially reared sea bream (*Sparus*  
618 *aurata*). *MicrobiologyOpen*, 3(5): 718 – 728. <https://doi.org/10.1002/mbo3.202>
- 619 Larsen AM, Mohammed HH, Arias CR (2014). Characterization of the gut microbiota of three  
620 commercially valuable warmwater fish species. *Journal of Applied Microbiology* 116:  
621 1396–1404.
- 622 Ley RE, Hamady M, Lozupone C, Turnbaugh PJ and others (2008). Evolution of mammals and their  
623 gut microbes. *Science* 320: 1647–1651. <https://doi.org/10.1126/science.1155725>
- 624 Li J, Ni J, Li X, Yan Q, Yu Y (2013a). Relationship between gastrointestinal bacterial structure and  
625 development of *Silurus soldatovi meridodalis*. *Chin. Acta Hydrobiologica Sinica* 37: 613–619.
- 626 Li X, Yan Q, Xie S, Hu W, Yu Y, Hu Z (2013b). Gut microbiota contributes to the growth of fast-  
627 growing transgenic common carp (*Cyprinus carpio* L.). *PLoS One* 8: e64577.
- 628 Li J, Ni J, Wang C, Li X, Wu S, Zhang T *et al.* (2014a). Comparative study on gastrointestinal  
629 microbiota of eight fish species with different feeding habits. *Journal of Applied*  
630 *Microbiology* 117: 1750–1760.
- 631 Li X, Zhu Y, Yan Q, Ringø E, Yang D (2014b). Do the intestinal microbiotas differ between  
632 paddlefish (*Polyodon spathala*) and bighead carp (*Aristichthys nobilis*) reared in the same  
633 pond? *Journal of Applied Microbiology* 117: 1245–1252.
- 634 Li T, Long M, Gatesoupe FJ, Zhang Q, Li A, Gong X (2015a). Comparative Analysis of the Intestinal  
635 Bacterial Communities in Different Species of Carp by Pyrosequencing. *Microb Ecol.*,  
636 *Microb Ecol.*, 69:25–36. DOI 10.1007/s00248-014-0480-8.
- 637 Li H, Zhong Q, Wirth S, Wang W, Hao Y, Wu S, Zou H, Li W, Wang G (2015b). Diversity of  
638 autochthonous bacterial communities in the intestinal mucosa of grass carp  
639 (*Ctenopharyngodon idellus*) (Valenciennes) determined by culture-dependent and culture-  
640 independent techniques. *Aquaculture Research*, 46: 2344 – 2359.  
641 <https://doi.org/10.1111/are.12391> Li T, Li H, Gatesoupe FJ, She R, Lin Q, Yan X, Li J, Li X  
642 (2017). Bacterial Signatures of “Red-Operculum” Disease in the Gut of Crucian Carp  
643 (*Carassius auratus*). *Microb Ecol.*, 74: 510 – 521. <https://doi.org/10.1007/s00248-017-0967-1>

- 644 Liu Z, Ke X, Lu M, Gao F, Cao J, Zhu H, Wang M (2015). Identification and pathological observation  
645 of a pathogenic *Plesiomonas shigelloides* strain isolated from cultured tilapia (*Oreochromis*  
646 *niloticus*). *Wei Sheng Wu Xue Bao*, 55, 96–106.
- 647 Liu H, Guo X, Gooneratne R, Lai R, Zeng C, Zhan F et al. (2016). The gut microbiome and  
648 degradation enzyme activity of wild freshwater fishes influenced by their trophic levels.  
649 *Scientific Reports* 6: 24340.
- 650 Lubbs D, Vester B, Fastinger N, Swanson K (2009). Dietary protein concentration affects intestinal  
651 microbiota of adult cats: a study using DGGE and qPCR to evaluate differences in microbial  
652 populations in the feline gastrointestinal tract. *J Anim Physiol Anim Nutr* 93:113–121
- 653 MacFarlane RD, McLaughlin JJ, Bullock GL (1986). Quantitative and qualitative studies of gut flora  
654 in striped bass from estuarine and coastal marine environments. *J Wildl Dis* 22: 344–348.
- 655 Márquez-Couturier G, Álvarez-González CA, Contreras-Sánchez WM, Hernández-Vidal U,  
656 Hernández-Franyutti AA, Mendoza-Alfaro RE, Aguilera-González C, García-Galano T,  
657 Civera-Cerecedo R & Goytortua-Bores E (2006). Avances en la alimentación y nutrición de  
658 pejelagarto *Atractosteus tropicus*. p. 446-523. In: Cruz Suárez, L. E., D. Ricque-Marie, M.  
659 Tapia-Salazar, M.G. Nieto-López, D.A. Villarreal-Cabazos, A.C. Puello & A. García-Ortega  
660 (Eds.). Avances en Nutrición Acuícola VIII. VIII Simposium Internacional de Nutrición  
661 Acuícola. 15 al 17 Noviembre. Universidad Autónoma de Nuevo León, Monterrey, Nuevo  
662 León, México.
- 663 Márquez-Couturier G, Vázquez-Navarrete CJ (2015). Estado de arte de la biología y cultivo de  
664 pejelagarto (*Atractosteus tropicus*). *Agroproductividad* 3:44-51. ISSN 24487546.
- 665 Márquez-Couturier G, Vázquez-Navarrete CJ, Contreras-Sánchez WM, Alvarez-González CA  
666 (2015). Acuicultura tropical sustentable: Una estrategia para la producción y conservación  
667 del pejelagarto (*Atractosteus tropicus*) en Tabasco, México. 2nd edition. Colección José  
668 Narciso Roviroso. Villahermosa, Tabasco, Mexico. 87 p.
- 669 Martens JH, Barg H, Warren MJ, Jahn D (2002). Microbial production of vitamin B12. *Appl*  
670 *Microbiol Biotechnol*, 58: 275 – 285.
- 671 Martín-Antonio B, Manchado M, Infante C, Zerolo R, Labella A, Alonso C, Borrego JJ (2007)  
672 Intestinal microbiota variation in Senegalese sole (*Soleasenegalensis*) under different feeding  
673 regimes. *Aquacult Res* 38: 1213–1222
- 674 Martínez-Cruz P, Ibáñez AL, Monroy-Hermosillo O, Ramirez-Saad HC (2012). Use of Probiotics in  
675 Aquaculture. *ISRN Microbiology*, 2012:13, ID 916845. <https://doi.org/10.5402/2012/916845>
- 676 Martínez-Díaz SF, Pérez-Espana H (1999) Feasible mechanisms for algal digestion in the king  
677 angelfish. *Journal of Fish Biology*, 55: 692–703.
- 678 McBain JA, Eastman A, Nobel CS Mueller GC (1997). Apoptotic death in adenocarcinoma cell lines  
679 induced by butyrate and other histone deacetylase inhibitors. *Biochem Pharmacol*, 53: 1357  
680 – 1368.
- 681 Méndez-Marín O, Hernández-Franyutti AA, Álvarez-González CA, Contreras-Sánchez WM,  
682 Uribe-Aranzábal, MC (2012). Histología del ciclo reproductor de hembras del pejelagarto



- 683 *Atractosteus tropicus* (Lepisosteiformes: Lepisosteidae) en Tabasco, México. Revista de  
684 Biología Tropical. Universidad de Costa Rica, Costa Rica. 60:1857-1871. ISSN: 0034-7744.
- 685 Miller RR, Minckley WL & Norris SM (2005). Freshwater fishes of Mexico. University of Chicago  
686 press, Chicago and London. 490 p.
- 687 Miyake S, Ngugi DK, Stingl U (2015). Diet strongly influences the gut microbiota of surgeonfishes.  
688 Molecular Ecology 24: 656–672.
- 689 Moran D, Turner SJ, Clements KD (2005). Ontogenetic Development of the Gastrointestinal  
690 Microbiota in the Marine Herbivorous Fish *Kyphosus sydneyanus*. Microbial Ecology, 49: 590  
691 – 597. <https://doi.org/10.1007/s00248-004-0097-4>
- 692 Nam YD, Jung MJ, Roh SW, Kim MS, Bae JW (2011). Comparative analysis of Korean human gut  
693 microbiota by barcoded pyrosequencing. PLoS One 6:e22109.  
694 <https://doi.org/10.1371/journal.pone.0022109>
- 695 Nayak SK (2010). Role of gastrointestinal microbiota in fish. Aquaculture Research 41: 1553–1573.
- 696 Nelson SJ (2006). Fishes of the World. 4th Edition. A Wiley-Interscience publication. EEUU. 601 p.
- 697 Newman JT Jr, Cosenza BJ, Buck JD (1972). Aerobic microflora of the bluefish (*Pomatomus saltatrix*)  
698 intestine. J Fish Res Board Can 29:333–336.
- 699 Ni J, Yu Y, Zhang T, Gao L (2012). Comparison of intestinal bacterial communities in grass carp,  
700 *Ctenopharyngodon idellus*, from two different habitats. Chinese Journal of Oceanology and  
701 Limnology, 30: 757–765. <https://doi.org/10.1007/s00343-012-1287-4>
- 702 Nielsen HB, Almeida M, Juncker AS, Rasmussen S, Li J, Sunagawa S, et al. (2014). Identification  
703 and assembly of genomes and genetic elements in complex metagenomic samples without  
704 using reference genomes. Nature Biotechnology 32: 822– 828.
- 705 Nuez-Ortin WG, Prado S, Toranzo AE (2012). Antimicrobial properties of butyric acid and other  
706 organic acids against pathogenic bacteria affecting the main aquatic species. In AQUA 2012.  
707 Prague.
- 708 Núñez de la Rosa MG (2011). Evaluación preliminar de las poblaciones bacterianas asociadas al  
709 tracto intestinal de la tilapia (*Oreochromis niloticus*) expuestas a aceites esenciales de  
710 orégano en la dieta. Tesis de Maestría. Facultad de Ciencias. Universidad Nacional de  
711 Colombia. Pp 1 – 87.
- 712 Onarheim AM, Wiik R, Burghardt J, Stackebrandt E (1994). Characterization and identification of  
713 two *Vibrio* species indigenous to the intestine of fish in cold sea water; description of *Vibrio*  
714 *iliopiscarius* sp. nov. Systematic and Applied Microbiology 17: 370 – 379.
- 715 Owen MA, Waines P, Bradley G, Davies S (2006). The effect of dietary supplementation of sodium  
716 butyrate on the growth and microflora of *Clarias gariepinus* (Burchell 1822). In Proceedings  
717 of the XII International Symposium Fish Nutrition and Feeding ed. Deneri, O.E. pp. 301.  
718 Biarritz, France

- 719 Pagnier I, Raoult D, La Scola B (2011). Isolation and characterization of *Reyranella massiliensis* gen.  
720 nov., sp. nov. from freshwater samples by using an amoeba co-culture procedure. Int J Syst  
721 Evol Microbiol, 61: 2151 – 2154.
- 722 Paul F, Otte J, Schmitt I, Dal Grande F (2018). Comparing Sanger sequencing and high-throughput  
723 metabarcoding for inferring photobiont diversity in lichens. Scientific Reports, 8: 8624.  
724 <https://doi.org/10.1038/s41598-018-26947-8>
- 725 Pikuta EV, Hoover RB, Marsic D, Whitman WB, Lupa B, Tang J, Krader P (2009). *Proteocatella*  
726 *sphenisci* gen. nov., sp. nov., a psychrotolerant, spore-forming anaerobe isolated from  
727 penguin guano. Int J Syst Evol Microbiol 59: 2302 – 2307.
- 728 Pirarat N, Kobayashi T, Katagiri T, Maita M, Endo M (2006). Protective effects and mechanisms of  
729 a probiotic bacterium *Lactobacillus rhamnosus* against experimental *Edwardsiella tarda*  
730 infection in tilapia (*Oreochromis niloticus*). Vet Immunol Immunopathol, 113: 339–347.
- 731 Qi XZ, Xue MY, Yang SB, Zha JW, Wang GX, Ling F (2017). Ammonia exposure alters the  
732 expression of immune-related and antioxidant enzymes-related genes and the gut  
733 microbial community of crucian carp (*Carassius auratus*). Fish & Shellfish Immunology, 70:  
734 485 – 492. <https://doi.org/10.1016/j.fsi.2017.09.043>
- 735 Ray AK, Ghosh K, Ringø E (2012). Enzyme-producing bacteria isolated from fish gut: a review.  
736 Aquaculture Nutrition, 18: 465– 492.
- 737 Reséndez-Medina A, Salvadores-Baledón ML (1983). Contribución al conocimiento de la biología  
738 del pejelagarto *Lepisosteus tropicus* (Gill) y la tenguayaca *Petenia splendida* Günther, del  
739 estado de Tabasco. Biótica 8: 413-426.
- 740 Rimmer DW, Wiebe RJ (1987). Fermentative microbial digestion in herbivorous fishes. Journal of  
741 Fish Biology, 31:229–236.
- 742 Ringø E, Strøm E, Tabachek JA (1995). Intestinal microflora of salmonids: a review. Aquacult Res.  
743 26: 773–789.
- 744 Ringø E, Sperstad S, Myklebust R, Refstie S, Krogdahl Å (2006). Characterisation of the microbiota  
745 associated with intestine of Atlantic cod (*Gadus morhua* L.): the effect of fish meal, standard  
746 soybean meal and a bioprocessed soybean meal. Aquaculture 261: 829–841.
- 747 Roeselers G, Mittge EK, Stephens WZ, Parichy DM, Cavanaugh CM, Guillemin K, Rawls JF (2011).  
748 Evidence for a core gut microbiota in the zebrafish. ISME J 5: 1595 – 1608
- 749 Roth JR, Lawrence JG, Bobik TA (1996). Cobalamin (coenzyme B12): synthesis and biological  
750 significance. Annu Rev Microbiol, 50: 137 – 181.
- 751 Rudi K, Angell IL, Pope PB, Vik JO, Sandve SR, Snipen LG (2018). Stable Core Gut Microbiota across  
752 the Freshwater-to-Saltwater Transition for Farmed Atlantic Salmon. Applied and  
753 Environmental Microbiology, 84: e01974 – 17. <https://doi.org/10.1128/AEM.01974-17>
- 754 Salinas I, Cuesta A, Esteban MA, Meseguer J (2005). Dietary administration of *Lactobacillus*  
755 *delbrii* and *Bacillus subtilis*, single or combined, on gilthead sea bream cellular innate  
756 immune responses. Fish Shellfish Immunol 19: 67–77.

- 757 Skrodenytė Arbačiauskienė V, (2007). Enzymatic activity of intestinal bacteria in roach *Rutilus*  
758 *rutilus* L. *Fish Sci*, 73: 964 – 966.
- 759 Smriga S, Sandin SA, Azam F (2010). Abundance, diversity, and activity of microbial assemblages  
760 associated with coral reef fish guts and feces. *FEMS Microbiology Ecology*, 73: 31 – 42.  
761 <https://doi.org/10.1111/j.1574-6941.2010.00879.x>
- 762 Smith AG, Croft MT, Moulin M, Webb ME (2007). Plants need their vitamins too. *Curr Opin Plant*  
763 *Biol*, 10: 266 – 275.
- 764 Spanggaard B, Huber I, Nielsen J, Nielsen T, Appel KF, Gram L (2000). The microflora of rainbow  
765 trout intestine: a comparison of traditional and molecular identification. *Aquaculture* 182:  
766 1 – 15.
- 767 Subasinghe RP (2005). Epidemiological approach to aquatic animal health management:  
768 opportunities and challenges for developing countries to increase aquatic production  
769 through aquaculture. *Prev. Vet. Med.* 67: 117–124.
- 770 Sullam KE, Essinger SD, Lozupone CA, O'Connor MP, Rosen GL, Knight R, Kilham SS, Russell JA  
771 (2012). Environmental and ecological factors that shape the gut bacterial communities of  
772 fish: a meta-analysis. *Molecular Ecology*, 21: 3363 – 3378. [https://doi: 10.1111/j.1365-](https://doi.org/10.1111/j.1365-294X.2012.05552.x)  
773 [294X.2012.05552.x](https://doi.org/10.1111/j.1365-294X.2012.05552.x)
- 774 Suttle CA (2007). Marine viruses—major players in the global ecosystem. *Nature Reviews*  
775 *Microbiology*, 5: 801 – 812.
- 776 Tamaki H, Wright CL, Li X, Lin Q, Hwang C, Wang S, Thimmapuram J, Kamagata Y, Liu WT (2011).  
777 Analysis of 16S rRNA Amplicon Sequencing Options on the Roche/454 Next-Generation  
778 Titanium Sequencing Platform. *PLOS ONE* 6:  
779 e25263. <https://doi.org/10.1371/journal.pone.0025263>
- 780 Theodorakopoulos N, Bachar D, Christen R, Alain K, Chapon V (2013). Exploration of *Deinococcus-*  
781 *Thermus* molecular diversity by novel group-specific PCR primers. *Microbiologyopen*, 2: 862  
782 – 72. <https://doi.org/10.1002/mbo3.119>
- 783 Thomas F, Hehemann JH, Rebuffet E, Czjzek M, Michel G (2011). Environmental and gut  
784 Bacteroidetes: the food connection. *Front Microbiol*, 2: 93.  
785 <https://doi.org/10.3389/fmicb.2011.00093>
- 786 Titus E, Ahearn GA (1988). Short-chain fatty-acid transport in the intestine of a herbivorous teleost.  
787 *J Exp Biol* 135, 77–94.
- 788 Tsuchiya C, Sakata T, Sugita H (2007). Novel ecological niche of *Cetobacterium somerae*, an anaerobic  
789 bacterium in the intestinal tracts of freshwater fish. *Letters in Applied Microbiology* ISSN  
790 0266-8254.
- 791 Tsuchiya C, Sakata T, Sugita H (2008). Novel ecological niche of *Cetobacterium somerae*, an anaerobic  
792 bacterium in the intestinal tracts of freshwater fish. *Letters in Applied Microbiology* 46: 43–  
793 48. <https://doi.org/10.1111/j.1472-765X.2007.02258.x>.

- 794 Turnbaugh PJ, Hamady M, Yatsunenko T, Cantarel BL, Duncan A, Ley RE, Sogin ML, Jones WJ,  
795 Roe BA, Affourtit JP (2009). A core gut microbiome in obese and lean twins. *Nature* 457:  
796 480 – 484
- 797 Uffen R (1997). Xylan degradation: a glimpse at microbial diversity. *J Ind Microbiol Biotechnol* 19:1–  
798 6.
- 799 Uz I, Ogram AV (2006). Cellulolytic and fermentative guilds in eutrophic soils of the Florida  
800 Everglades. *FEMS Microbiol Ecol* 57:396–408
- 801 Verner-Jeffreys DW, Shields RJ, Bricknell IR, Birkbeck TH (2003). Changes in the gut-associated  
802 microflora during the development of Atlantic halibut (*Hippoglossus hippoglossus* L.) larvae  
803 in three British hatcheries. *Aquaculture* 219: 21 – 42.
- 804 Verschuere L, Rombaut G, Sorgeloos P, Verstraete W (2000). Probiotic Bacteria as Biological Control  
805 Agents in Aquaculture *Microbiology and Molecular Biology Reviews*, 64: 655 – 671.
- 806 Villamil L, Tafalla C, Figueras A, Novoa B (2002). Evaluation of immunomodulatory effects of lactic  
807 acid bacteria in turbot (*Scophthalmus maximus*). *Clin Diagn Lab Immunol* 9:1318–1323.
- 808 Vogiatzoglou A, Smith AD, Nurk E, Berstad P, Drevon CA, Ueland PM, Vollset SE, Tell GS, Refsum  
809 H (2009). Dietary sources of vitamin B-12 and their association with plasma vitamin B-12  
810 concentrations in the general population: the Hordaland Homocysteine Study. *The*  
811 *American Journal of Clinical Nutrition*, 89: 1078–1087.  
812 <https://doi.org/10.3945/ajcn.2008.26598>
- 813 Wang AR, Ran C, Ringø E, Zhou ZG (2017). Progress in fish gastrointestinal microbiota research.  
814 *Aquaculture* 0:1–15. <https://doi.org/10.1111/raq.12191>
- 815 Walczak N, Puk K, Guz L (2017). Bacterial flora associated with diseased freshwater ornamental  
816 fish. *J Vet Res*, 61: 445 – 449. <https://doi.org/10.1515/jvetres-2017-0070>
- 817 Ward NL, Steven B, Penn K, Methe BA, Detrich WH (2009). Characterization of the intestinal  
818 microbiota of two Antarctic notothenioid fish species. *Extremophiles* 13: 679 – 685.
- 819 Weisburg WG, Barns SM, Pelletier DA Lane DJ (1991). 16S ribosomal DNA amplification for  
820 phylogenetic study. *J. Bacteriol.* 173: 697 – 703.
- 821 Wiley O (1976). The phylogeny and biogeography of fossil and recent gars (Actinopterygii:  
822 Lepisosteidae). *Univ. KS. Hist. Nat. Mus. Publ.* 64: 1 – 11.
- 823 Wong S, Waldrop T, Summerfelt S, Davidson J, Barrows F, Kenney PB, Welch T, Wiens GD, Snekvik  
824 K, Rawls JF (2013). Aquacultured rainbow trout (*Oncorhynchus mykiss*) possess a large  
825 core intestinal microbiota that is resistant to variation in diet and rearing density. *Appl*  
826 *Environ Microbiol* 79:4974–4984
- 827 Wu S, Wang G, Angert ER, Wang W, Li W, Zou H (2012). Composition, diversity, and origin of the  
828 bacterial community in grass carp intestine. *PLoS One* 7:e30440. doi: 10.1371/journal.  
829 pone.0030440

- 830 Wyatt LE, Nickelson R, Vanderzant C (1979). Occurrence and control of Salmonella in freshwater  
831 catfish. *J. Food Sci.* 44: 1067 – 1069.
- 832 Xia JH, Lin G, Fu GH, Wan ZY, Lee M, Wang L, Liu XJ, Yue GH (2014). The intestinal microbiome  
833 of fish under starvation. *BMC Genomics*, 15:266. <http://doi.org/10.1186/1471-2164-15-266>
- 834 Xu J, Bjursell MK, Himrod J, Deng S, Carmichael LK, Chiang HC, Hooper LV, Gordon JI (2003). A  
835 genomic view of the human-Bacteroides thetaiotaomicron symbiosis. *Science*, 299:2074–  
836 2076.
- 837 Ye L, Amberg J, Chapman D, Gaikowski M, Liu WT (2014). Fish gut microbiota analysis  
838 differentiates physiology and behaviour of invasive Asian carp and indigenous American  
839 fish. *ISME Journal*, 8: 541–551. <https://doi.org/10.1038/ismej.2013.181>

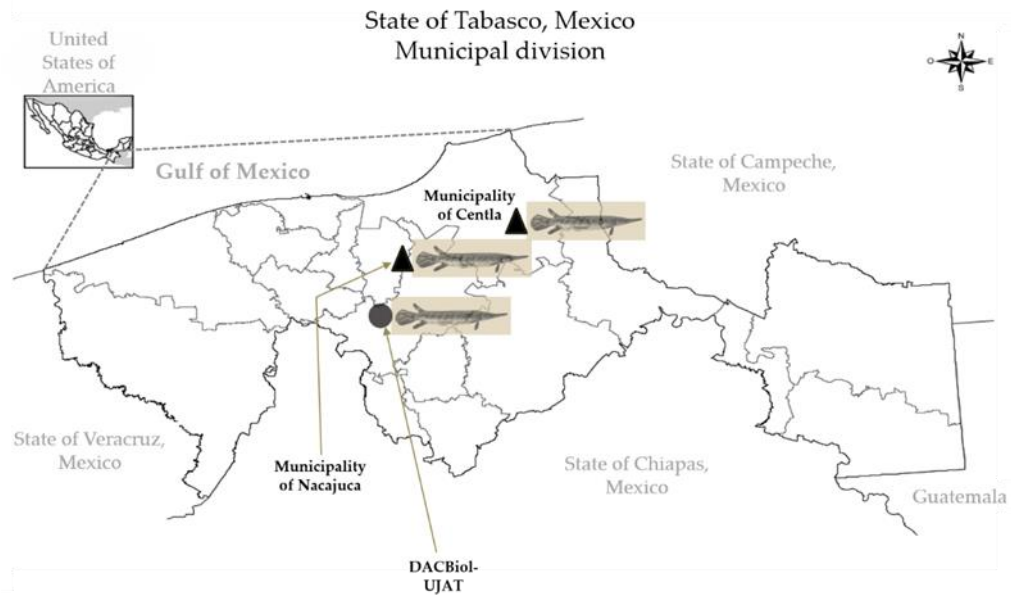

**Figure 1.** Collection sites of wild (triangle figures) and cultivated (circle figure) of the adults' tropical gars (*Atractosteus tropicus*)

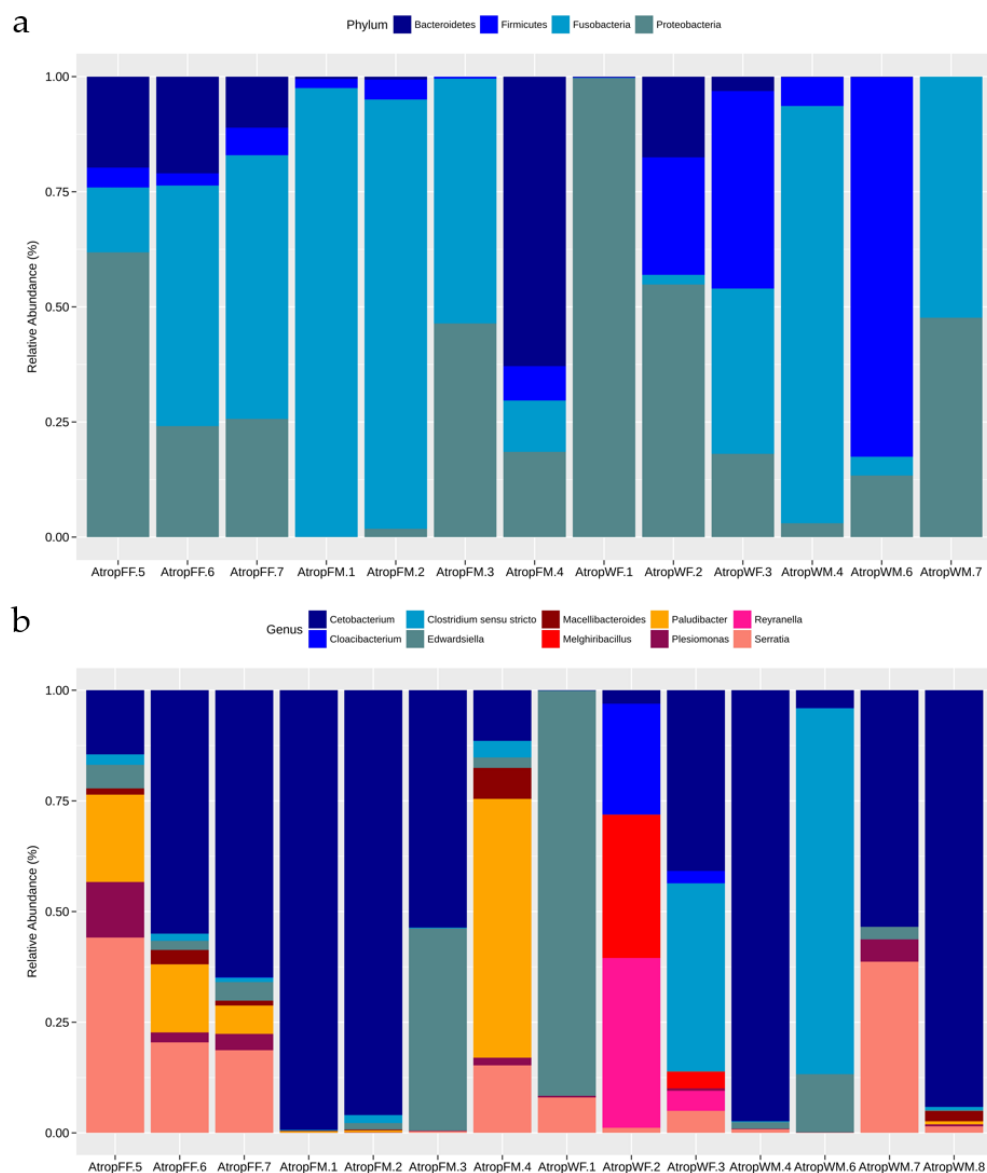

**Figure 2.** Taxonomic summary at different levels of relative bacterial abundance. (a) Phyla and (b) Genus. First letter W: wild or F: Farming individuals. Second letter sex M: male or F: female. Only taxa with relative abundance  $\geq 1\%$  are shown.

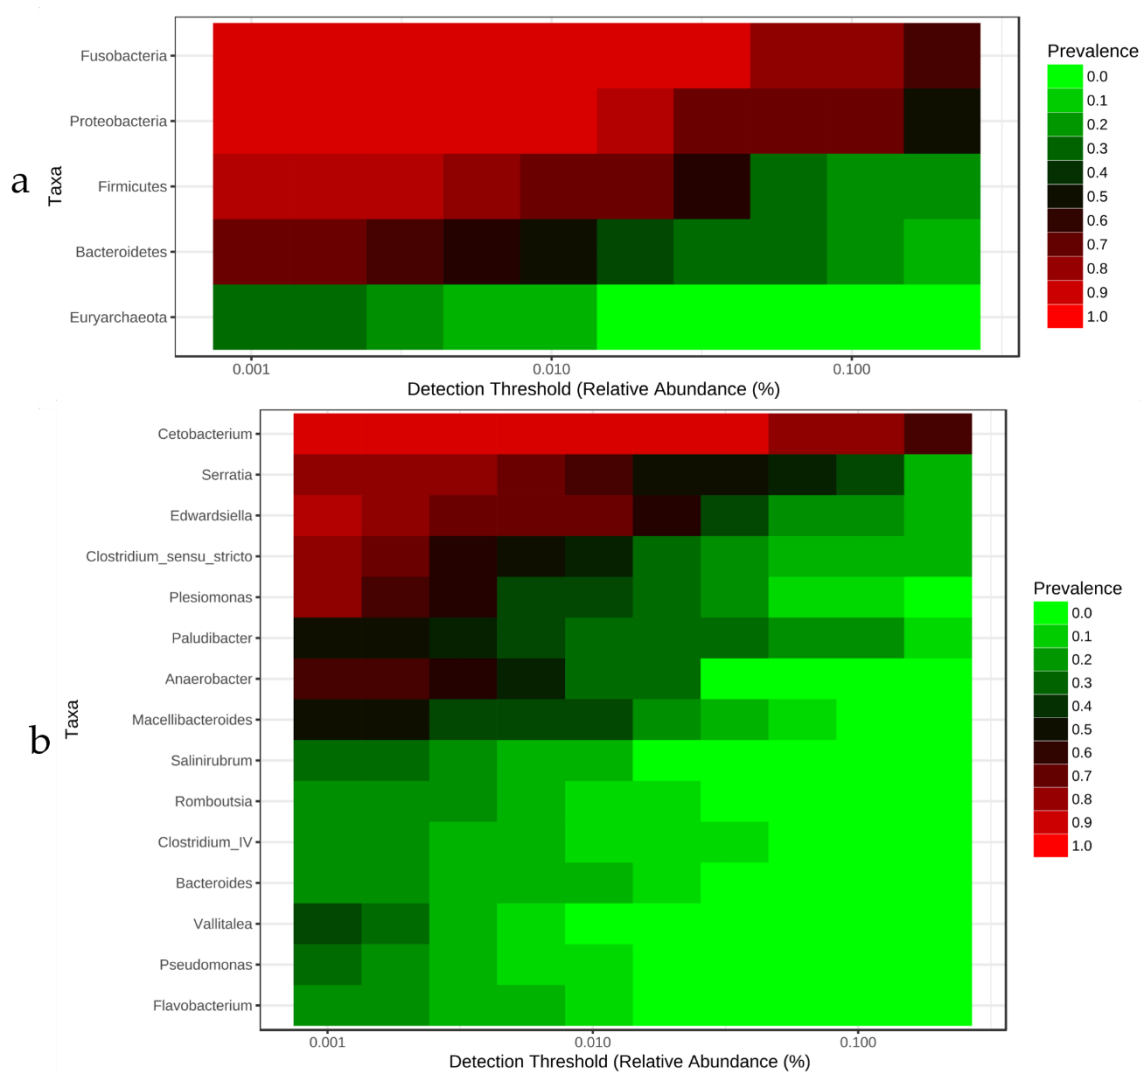

**Figure 3.** Core microbiome in gut of cultivated/wild and female/male adults' *A. tropicus*, at taxonomic class-level of (a) phylum and (b) genus.



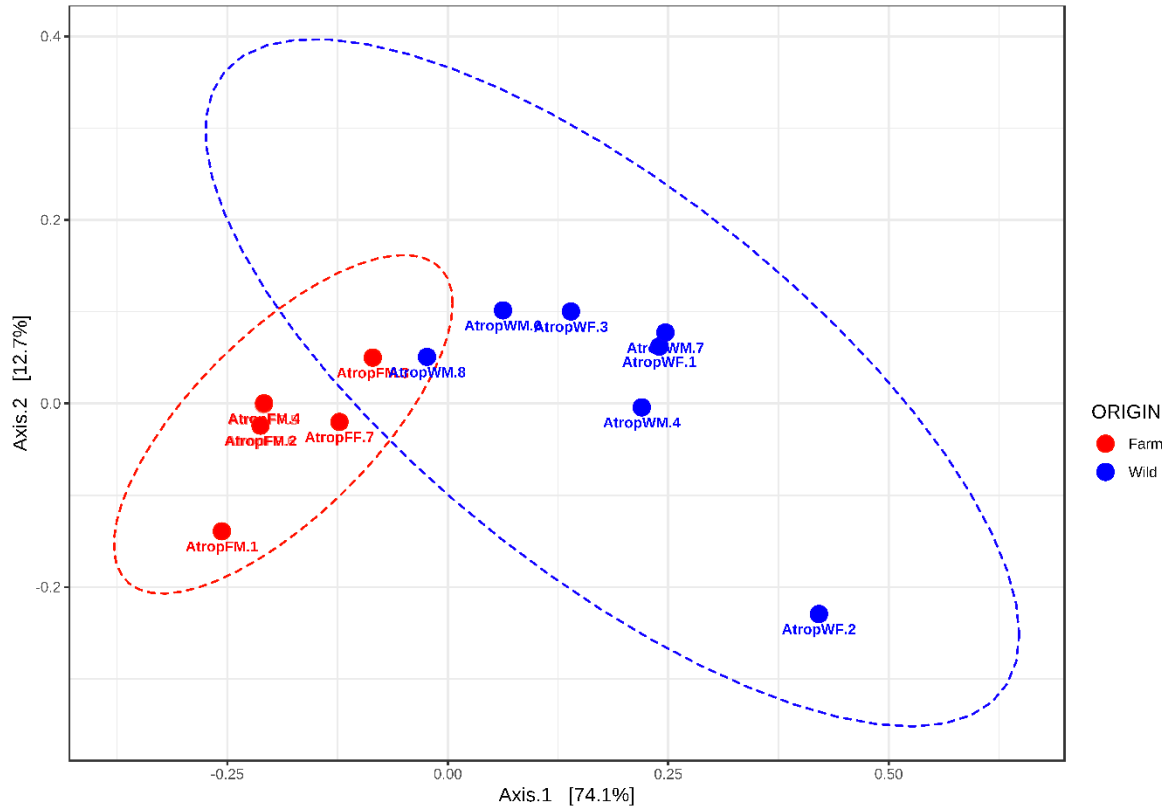

**Figure 4.** Similarity or dissimilarity coefficients of Unweighted UniFrac distances (UniFrac) by PCoA ordination analysis of the microbiota in adults' *A. tropicus*. Blue and red circles correspond to wild and cultivated individuals, respectively

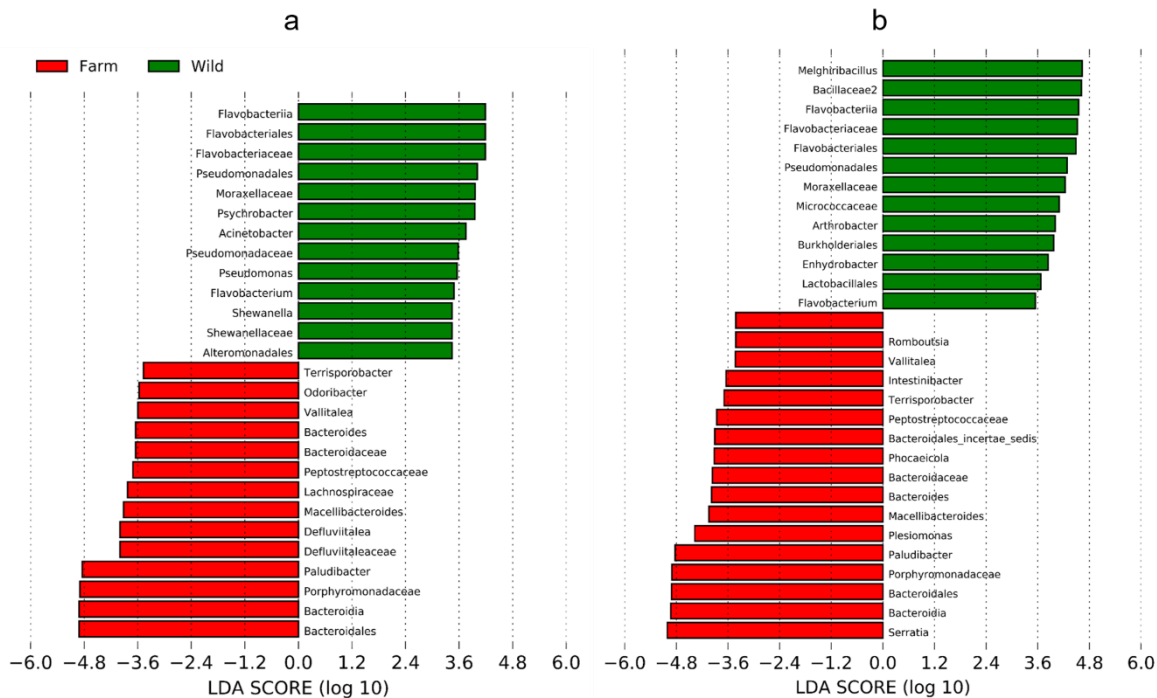

**Figure 5.** LefSe analysis with the LDA score histogram of microbiota in adults' *A. tropicus* composition, (a) comparison among female and male organisms, cultivated and wild, and (b) comparison among female organisms cultivated and wild. Both show statistically significant differences depending on the origin. Red and green colors indicate cultivated and wild samples, respectively.

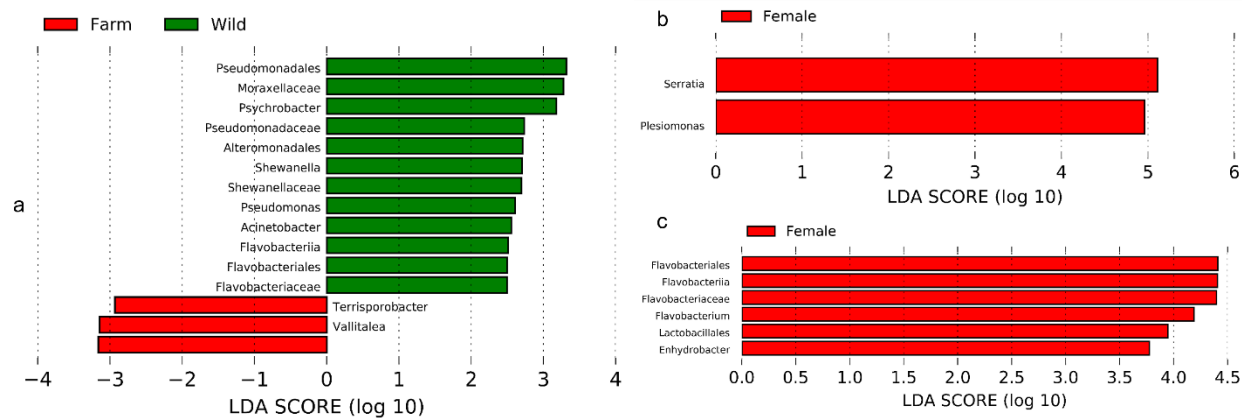

**Figure 6.** LefSe analysis with the LDA score histogram of microbiota in adults' *A. tropicus* composition (a) male organisms, cultivated & wild, (b) female organisms cultivated and (c) wild female. All show statistically significant differences depending on the origin.

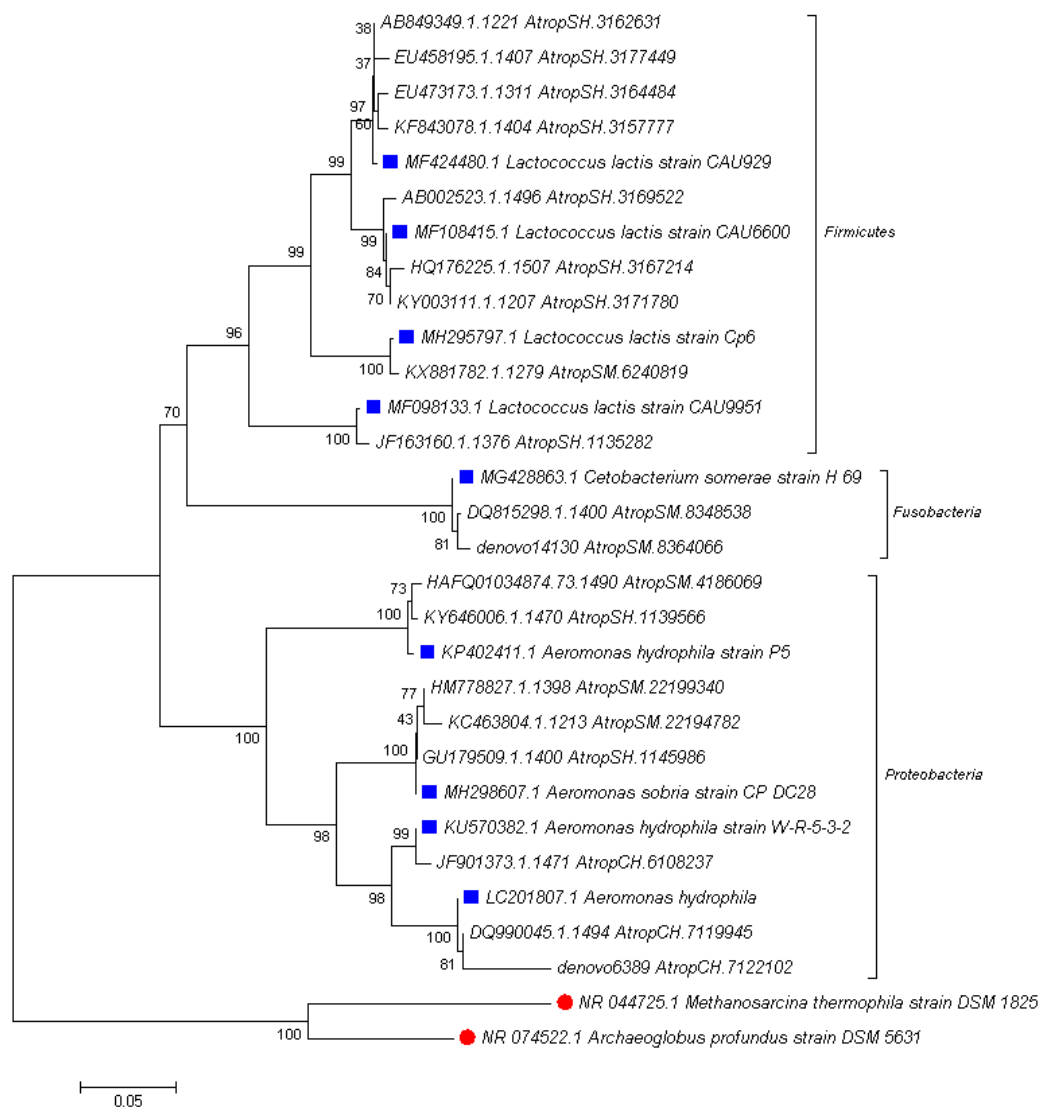

**Figure 7.** Phylogenetic tree from the rRNA 16S gene constructed of some organisms found in the literature with probiotic potential in fish (see table 1). Red circles and blue squares represent outgroup and reference sequences, respectively.
