# Supplementary material for: Gut Microbiome Analysis In Adult Tropical Gars (Atractosteus tropicus)
Source: bioRxiv or medRxiv preprint supplement (doi:10.1101/557629), 2019-02-22
Supplement: Supplementary file [file media-1.pdf]

**Table 1.** Bibliographic information obtained from certain genera with probiotic potential in fish

| Bacteria                                  | Function  | Description                                                                                                              | Fish                         | Reference                                                                                                                                                                                                                                                                                           |
|-------------------------------------------|-----------|--------------------------------------------------------------------------------------------------------------------------|------------------------------|-----------------------------------------------------------------------------------------------------------------------------------------------------------------------------------------------------------------------------------------------------------------------------------------------------|
| <i>Aeromonas hydrophila</i>               | probiotic | antagonist                                                                                                               | <i>Oncorhynchus mykiss</i>   | Irianto A, Austin B (2002b). Use of probiotics to control furunculosis in rainbow trout, <i>Oncorhynchus mykiss</i> (Walbaum). J. Fish Dis. 25:1–10. doi: 10.1046/j.1365-2761.2002.00375.x                                                                                                          |
| <i>Aeromonas salmonicida</i>              | pathogen  | etiologic agent of septicemic disease                                                                                    | <i>Oncorhynchus mykiss</i>   |                                                                                                                                                                                                                                                                                                     |
| <i>Rhodococcus qingshengii</i>            | probiotic | antagonist                                                                                                               | <i>Salvelinus fontinalis</i> | Boutin S, Bernatchez L, Audet C, Derôme N (2012). Antagonistic effect of indigenous skin bacteria of brook charr ( <i>Salvelinus fontinalis</i> ) against <i>Flavobacterium columnare</i> and <i>F. psychrophilum</i> . Vet. Microbiol. 155: 355–361. doi: 10.1016/j.vetmic.2011.09.002             |
| <i>Flavobacterium psychrophilum</i>       | pathogen  | systemic infectious agent                                                                                                | <i>Salvelinus fontinalis</i> |                                                                                                                                                                                                                                                                                                     |
| <i>Cetobacterium somerae</i>              | probiotic | vitamin B12 production                                                                                                   | various                      | Tsuchiya C, Sakata T, Sugita H (2008). Novel ecological niche of <i>Cetobacterium somerae</i> , an anaerobic bacterium in the intestinal tracts of (I), 43–48. <i>reshwater fish. Lett. Appl. Microbiol.</i> 46:43–48. doi:10.1111/j.1472-765X.2007.02258.x                                         |
| <i>Vibrio fluvialis</i>                   | probiotic | Immune stimulation and improved survival after challenge with <i>Aeromonas salmonicida</i>                               | <i>Oncorhynchus mykiss</i>   | Irianto A & Austin B (2002a). Use of probiotics to control furunculosis in rainbow trout <i>Oncorhynchus mykiss</i> (Walbaum). J Fish Dis 25: 333–342                                                                                                                                               |
| <i>Lactococcus lactis</i> CECT 539        | probiotic | Immune stimulation                                                                                                       | <i>Scophthalmus maximus</i>  | Villamil L, Tafalla C, Figueras A, Novoa B (2002). Evaluation of immunomodulatory effects of lactic acid bacteria in turbot ( <i>Scophthalmus maximus</i> ). Clin Diagn Lab Immunol 9:1318–1323.                                                                                                    |
| <i>Lactobacillus delbrueckii</i> CECT 287 | probiotic | Immune stimulation                                                                                                       | <i>Sparus aurata</i>         | Salinas I, Cuesta A, Esteban MA, Meseguer J (2005). Dietary administration of <i>Lactobacillus delbrueckii</i> and <i>Bacillus subtilis</i> , single or combined, on gilthead sea bream cellular innate immune responses. Fish Shellfish Immunol 19: 67–77.                                         |
| <i>Bacillus subtilis</i> CECT 35          | probiotic | Immune stimulation                                                                                                       | <i>Sparus aurata</i>         |                                                                                                                                                                                                                                                                                                     |
| <i>Aeromonas sobria</i> GC2               | probiotic | Immune stimulation and improved survival after challenge with <i>Lactococcus garvieae</i> and <i>Streptococcus iniae</i> | <i>Oncorhynchus mykiss</i>   | Brunt J, Austin B (2005). Use of a probiotic to control lactococcosis and streptococcosis in rainbow trout, <i>Oncorhynchus mykiss</i> (Walbaum). J Fish Dis 28: 693–701.                                                                                                                           |
| <i>Lactobacillus rhamnosus</i> ATCC 53103 | probiotic | Immune stimulation and improved survival after challenge with <i>Edwardsiella tarda</i>                                  | <i>Oreochromis niloticus</i> | Pirarat N, Kobayashi T, Katagiri T, Maita M, Endo M (2006). Protective effects and mechanisms of a probiotic bacterium <i>Lactobacillus rhamnosus</i> against experimental <i>Edwardsiella tarda</i> infection in tilapia ( <i>Oreochromis niloticus</i> ). Vet Immunol Immunopathol, 113: 339–347. |
| <i>Carnobacterium inhibens</i>            | probiotic | antibacterial activity against fish pathogens                                                                            | <i>Salmo salar</i>           | Joborn A, Dorsch M, Olsson JC, Westerdahl A, Kjelleberg S (1999). <i>Carnobacterium inhibens</i> sp nov., isolated from the intestine of Atlantic salmon ( <i>Salmo salar</i> ). Int. J. Syst. Bacteriol. 49:1891–1898.                                                                             |
| <i>Enterobacter amnigenus</i>             | probiotic | increased resistance toward <i>Flavobacterium psychrophilum</i>                                                          | <i>Oncorhynchus mykiss</i>   | Irianto A, Austin B (2002b). Use of probiotics to control furunculosis in rainbow trout, <i>Oncorhynchus mykiss</i> (Walbaum). J. Fish Dis. 25:1–10. doi: 10.1046/j.1365-2761.2002.00375.x                                                                                                          |

**Table 2.** Total reads by sex/origin and wild/cultivated

| Organisms | Reads   |            |
|-----------|---------|------------|
|           | Wild    | Cultivated |
| Female    | 99,513  | 59,539     |
| Male      | 137,792 | 67,891     |
| Subtotal  | 237,305 | 127,430    |
| Total     | 364,735 |            |

**Table 3.** Alpha diversity analysis per sample, sex/origin and origin

| Sample    | Chao1               | S.D. (Chao1) | Obs. OTUs         | S.D. (Obs. OTUs) | P.D.               | S.D. (P.D.) | Shannon           | S.D. (Shannon) |
|-----------|---------------------|--------------|-------------------|------------------|--------------------|-------------|-------------------|----------------|
| AtropFF.5 | 250.20 <sup>h</sup> | 57.17        | 179 <sup>fg</sup> | 53.77            | 6.09 <sup>fg</sup> | 1.27        | 4.12 <sup>k</sup> | 0.12           |
| AtropFF.6 | 229.41 <sup>g</sup> | 56.92        | 154 <sup>g</sup>  | 49.37            | 6.36 <sup>g</sup>  | 1.52        | 3.54 <sup>j</sup> | 0.11           |
| AtropFF.7 | 241.60 <sup>h</sup> | 46.18        | 185 <sup>j</sup>  | 51.61            | 9.16 <sup>j</sup>  | 1.64        | 4.46 <sup>m</sup> | 0.13           |
| AtropFM.1 | 75.65 <sup>b</sup>  | 22.22        | 54 <sup>a</sup>   | 15.88            | 2.60 <sup>a</sup>  | 0.61        | 1.50 <sup>c</sup> | 0.06           |
| AtropFM.2 | 144.24 <sup>e</sup> | 40.38        | 97 <sup>d</sup>   | 31.52            | 4.10 <sup>d</sup>  | 0.94        | 2.03 <sup>e</sup> | 0.10           |
| AtropFM.3 | 101.88 <sup>d</sup> | 29.58        | 69 <sup>a</sup>   | 21.85            | 2.54 <sup>a</sup>  | 0.51        | 2.52 <sup>f</sup> | 0.07           |
| AtropFM.4 | 210.05 <sup>f</sup> | 50.58        | 146 <sup>f</sup>  | 46.20            | 5.94 <sup>f</sup>  | 1.38        | 3.24 <sup>h</sup> | 0.11           |
| AtropWF.1 | 92.24 <sup>c</sup>  | 29.32        | 60 <sup>e</sup>   | 20.20            | 4.79 <sup>e</sup>  | 1.20        | 1.18 <sup>b</sup> | 0.06           |
| AtropWF.2 | 456.85 <sup>j</sup> | 110.76       | 296 <sup>k</sup>  | 98.54            | 13.52 <sup>k</sup> | 3.52        | 5.43 <sup>n</sup> | 0.17           |
| AtropWF.3 | 262.49 <sup>i</sup> | 61.28        | 186 <sup>j</sup>  | 56.11            | 7.64 <sup>i</sup>  | 1.67        | 4.43 <sup>i</sup> | 0.13           |
| AtropWM.4 | 49.84 <sup>a</sup>  | 14.01        | 37 <sup>e</sup>   | 11.28            | 4.60 <sup>e</sup>  | 0.72        | 0.86 <sup>a</sup> | 0.06           |
| AtropWM.6 | 216.94 <sup>f</sup> | 69.18        | 119 <sup>n</sup>  | 42.08            | 7.05 <sup>h</sup>  | 3.10        | 3.29 <sup>i</sup> | 0.09           |
| AtropWM.7 | 141.11 <sup>e</sup> | 36.74        | 97 <sup>c</sup>   | 30.10            | 3.63 <sup>c</sup>  | 0.90        | 3.16 <sup>g</sup> | 0.08           |
| AtropWM.8 | 94.20 <sup>cd</sup> | 34.04        | 59 <sup>b</sup>   | 18.75            | 3.31 <sup>b</sup>  | 1.52        | 1.57 <sup>d</sup> | 0.07           |

Kruskal-Wallis = p<0.01

| Sex/Origin | Chao1               | S.D. (Chao1) | Obs. OTUs        | S.D. (Obs. OTUs) | P.D.               | S.D. (P.D.) | Shannon           | S.D. (Shannon) |
|------------|---------------------|--------------|------------------|------------------|--------------------|-------------|-------------------|----------------|
| FF         | 465.74 <sup>a</sup> | 67.21        | 402 <sup>a</sup> | 91.40            | 14.62 <sup>a</sup> | 2.47        | 4.22 <sup>a</sup> | 0.06           |
| FM         | 374.76 <sup>b</sup> | 66.59        | 302 <sup>b</sup> | 79.96            | 9.57 <sup>b</sup>  | 2.04        | 3.24 <sup>b</sup> | 0.05           |
| WF         | 803.73 <sup>c</sup> | 120.84       | 675 <sup>c</sup> | 169.82           | 23.74 <sup>c</sup> | 4.77        | 5.57 <sup>c</sup> | 0.09           |
| WM         | 447.04 <sup>d</sup> | 88.21        | 339 <sup>d</sup> | 98.71            | 15.49 <sup>d</sup> | 4.50        | 4.05 <sup>d</sup> | 0.05           |

Kruskal-Wallis = p<0.01

| Origin | Chao1                | S.D. (Chao1) | Obs. OTUs        | S.D. (Obs. OTUs) | P. D.              | S.D. (P.D.) | Shannon           | S.D. (Shannon) |
|--------|----------------------|--------------|------------------|------------------|--------------------|-------------|-------------------|----------------|
| Farm   | 543.24 <sup>a</sup>  | 76.85        | 486 <sup>a</sup> | 105.77           | 16.29 <sup>a</sup> | 2.79        | 3.88 <sup>a</sup> | 0.07           |
| Wild   | 1090.53 <sup>b</sup> | 178.13       | 912 <sup>b</sup> | 239.31           | 31.67 <sup>b</sup> | 7.35        | 5.35 <sup>b</sup> | 0.10           |

W of Mann-Whitney (Wilcoxon) p<0.01

Multiple Range Test for Kruskal-Wallis (Bonferroni post-hoc):  
 - Different letters = p < 0.01  
 - Equal letters = p > 0.05

FF farmed o cultivated female  
 FM farmed o cultivated male  
 WF wildtype female  
 WM wildtype male
